# Supplementary material for: hsa_circ_0001018 promotes papillary thyroid cancer by facilitating cell survival, invasion, G1/S cell cycle progression, and repressing cell apoptosis via crosstalk with miR-338-3p and SOX4
Source: PubMed Central journal article supplement — Mol Ther Nucleic Acids. 2021 Feb 24;24:591–609. doi: 10.1016/j.omtn.2021.02.023 (PMC8054110; doi:10.1016/j.omtn.2021.02.023), 2021-02-24
Supplement: mmc2.pdf [file mmc2.pdf]

# hsa\_circ\_0001018 promotes papillary thyroid cancer by facilitating cell survival, invasion, G<sub>1</sub>/S cell cycle progression, and repressing cell apoptosis via crosstalk with miR-338-3p and SOX4

Qiang Luo,<sup>1</sup> Feng Guo,<sup>1</sup> Qingfeng Fu,<sup>2</sup> and Guoqing Sui<sup>1</sup>

<sup>1</sup>Department of Ultrasound, China-Japan Union Hospital of Jilin University, No. 126 Xiantai Street, Changchun 130033, Jilin, China; <sup>2</sup>Jilin Provincial Key Laboratory of Surgical Translational Medicine, Division of Thyroid Surgery, China-Japan Union Hospital of Jilin University, No. 126 Xiantai Street, Changchun 130033, Jilin, China

**We identified a novel interactome, circ\_0001018/miR-338-3p/SOX4, in papillary thyroid cancer (PTC), and we intended to confirm the regulatory relationship between the three and to study the effects of the three in PTC. The bioinformatics method was used to screen out the circular RNA and mRNA of interest. A cellular fractionation assay and fluorescence *in situ* hybridization (FISH) assay were conducted to prove that circ\_0001018 and CCT4 (the host gene of circ\_0001018) mRNA primarily localized in the cytoplasm of PTC cell lines. By qRT-PCR analysis, the expression of circ\_0001018 and SOX4 mRNA was found upregulated while the expression of miR-338-3p was found downregulated in PTC tissues and cells. circ\_0001018 silence significantly inhibited the tumor growth in xenografted nude mice. A series of cytological experiments such as a Cell Counting Kit-8 (CCK-8) assay, a 5-ethynyl-2'-deoxyuridine (EdU) assay, cell cycle profiling, wound healing, a transwell assay, and cell apoptosis were conducted and showed that circ\_0001018 and SOX4 promoted cell proliferation, migration, and invasion, inhibited cell apoptosis, and reduced the cell cycle arrest at the G<sub>1</sub> phase in PTC cells. Compared with circ\_0001018 and SOX4, miR-338-3p held the opposite function. The regulatory relationship between circ\_0001018 and miR-338-3p, and between miR-338-3p and SOX4 mRNA, was validated using a luciferase reporter gene assay and/or RNA immunoprecipitation (RIP assay). Our findings showed that circ\_0001018 acted as the tumor promoter via sponging miR-338-3p to elevate SOX4 expression level in PTC. Importantly, this novel circ\_0001018/miR-338-3p/SOX4 axis has the potential to be considered as a therapy target for PTC.**

## INTRODUCTION

Thyroid cancer is one of the most prevalent tumors with a gradual increase in morbidity and mortality, constantly threatening the health of human beings for decades.<sup>1</sup> The data on thyroid cancer occurrence, recurrence, and metastasis from the American Cancer Society<sup>2</sup> show that more than 50,000 new cases of thyroid cancer are estimated to be diagnosed. Among them, about 14,260 cases are male and 37,810 are female, and, unfortunately, 2,170 of them fail to survive. In China, data from the

National Cancer Center shows that about 22,000 males and 67,900 females are diagnosed with thyroid cancer each year.<sup>3</sup> Papillary thyroid cancer (PTC), one of the subtypes of thyroid cancer, has dramatically increased in incidence since 2009 and become the most threatening subtype of thyroid cancer.<sup>4</sup> Although traditional therapeutic methods could effectively treat PTC,<sup>5</sup> several patients in advanced stage with metastasis still show poor prognosis outcome.<sup>6</sup> The main reason is that the invasion and metastasis of PTC is uncontrollable.<sup>7</sup> Therefore, it is of great significance to study the molecular mechanisms of PTC development, searching for novel therapeutic targets to conquer the disease.

Circular RNA (circRNA) is an elusive class of non-coding RNA with poor understanding about the mechanisms and functions.<sup>8</sup> The latest research confirms that circRNAs are distributed in mammals to play important roles in multiple biological processes, such as cell growth, cell apoptosis, and cell proliferation.<sup>9–13</sup> Interestingly, an increasing number of studies have found that circRNAs are abnormally expressed in tumor tissues, which is closely related to the development of cancer.<sup>13</sup> Also, circRNA has been reported to be a sponge of microRNAs (miRNAs) to regulate the translation of downstream target mRNAs.<sup>14–16</sup> In PTC, Cai et al.<sup>7</sup> proved that circBACH2 was an oncogenic RNA in PTC by sponging miR-139-5p to increase the LMO4 expression. circ-ITCH impaired progression of PTC *in vivo* and *in vitro* via binding to miR-22-3p to promote CBL expression.<sup>17</sup> miR-338-3p that is downregulated in a variety of cancer species has been reported to act as a cancer suppressor by binding to a variety of circRNAs such as circRNA MAT2B, circ\_0000326, and circRNA HIPK3.<sup>18–20</sup> In our previous study, we proved that miR-338-3p was downregulated in thyroid cancer and inhibited the progression of thyroid cancer<sup>21</sup> so that we were eager to explore the upstream circRNAs sponging to miR-338-3p in PTC. By bioinformatics analysis, circ\_0001018 (circBase: hsa\_circ\_0001018) is predicted to sponge

Received 27 June 2020; accepted 19 February 2021;  
<https://doi.org/10.1016/j.omtn.2021.02.023>.

**Correspondence:** Guoqing Sui, Department of Ultrasound, China-Japan Union Hospital of Jilin University, No. 126 Xiantai Street, Changchun 130033, Jilin, China.  
E-mail: [suiguqing@jlu.edu.cn](mailto:suiguqing@jlu.edu.cn)

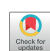

miR-338-3p (miRBase: hsa-miR-338-3p), and the regulatory mechanism of circ\_0001018 and the relationship between circ\_0001018 and miR-338-3p are still barely investigated in PTC.

SRY-box transcription factor 4 (SOX4, GenBank: NM\_003107.3) is a member of SOX (SRY-related HMG-box) family that encodes a number of transcription factors that might participate in embryonic development and cell apoptosis. SOX4 has been found to express in a large amount of tissues and to be involved in the development of the heart, B cells, and the reproductive system.<sup>22</sup> Recently, a close relationship between SOX4 and tumorigenesis has attracted the attention of researchers in the field of oncogenesis.<sup>23,24</sup> Min et al.<sup>25</sup> reported that SOX4 could be a potential chemoprevention target in PTC, but no functional experiments were done to further prove their bioinformatics results.

In our research, circ\_0001018 was prominently upregulated in PTC tissue samples, and its aberrant expression was found closely related with the phenotypic changes of PTC cells. Also, we found that circ\_0001018 could sponge miR-338-3p to release the expression of its downstream effector SOX4, which then promoted PTC cell aggression. Hence, our research might reveal a novel clue for the clinical therapeutic strategies against PTC and may inspire creative thinking for subsequent scientific investigation.

## RESULTS

### Identification, expression, and characterization of hsa\_circ\_0001018 in PTC

By interrogating ENCORI for the RNA interactomes (<http://starbase.sysu.edu.cn/index.php>) algorithm, we identified the top five most significant circRNAs based on Argonaute cross-linking and immunoprecipitation sequencing (AGO CLIP-seq) experimental evidence (Figure 1A). Among the top five circRNAs, hsa\_circ\_0000011 has two binding sites with miR-338-3p with an average context+ score of  $-0.147$ , and hsa\_circ\_0001018 has one binding site with miR-338-3p with a  $-0.158$  context+ score. hsa\_circ\_0000326 and hsa\_circ\_0000934 have a non-exon-formed structure, and hsa\_circ\_0001199 has no parental gene. Then, we measured the level of expression of the top five circRNAs in PTC tissue and cells, and it was found that circ\_0001018 was the most upregulated circRNA in 51 PTC tissues and cells compared with other circRNAs (Figures 1B and 1C; Figures S1A–S1H). We then conducted a RIP assay and found that hsa\_circ\_0001018 was the most significantly pulled-down circRNA by miR-338-3p mimic in the presence of Argonaute 2 (Ago2) protein (Figure S2). Therefore, hsa\_circ\_0001018 was identified as our circRNA of interest. hsa\_circ\_0001018 (348 nt in length) was formed by the back-splicing of exons 8, 9, and 10 of the host gene CCT4 (Figure S3). Moreover, we divided the 51 PTC tissues samples into 26 cases of high circ\_0001018 expression and 25 cases of low circ\_0001018 expression according to the median of circ\_0001018 expression, and we analyzed the correlation between circ\_0001018 expression and clinical pathology in patients with PTC. The results revealed that high expression of circ\_0001018 was found to be associated with tumor-lymph node-metastasis (TNM) staging, lymph node metastasis, and distant metastasis (Table S1). Because of the

highest circ\_0001018 levels in TPC-1 and IHH-4 cell lines (Figure 1C), these lines were chosen for subsequent experiments. The stability of circ\_0001018 was first conformed using the RNase R method and half-life detection method: CCT4 mRNA nearly disappeared in the lysate after 20 h of incubation, while circ\_0001018 stayed intact during the incubation (Figures 1D and 1E). The results confirmed that circRNA can be extremely stable whereas mRNA was particularly vulnerable. circRNAs consisting of exons have been found to be widely expressed in cytoplasm. We thus analyzed the abundance of circ\_0001018 in the cytoplasm and nucleus in TPC-1 and IHH-4 cell lines using qRT-PCR assays and fluorescence *in situ* hybridization (FISH). CCT4 mRNA and circ\_0001018 were both primarily distributed in cytoplasm (Figures 1F and 1G). In order to make clear the effect of circ\_0001018 on CCT4 expression level, we designed and synthesized the vectors that could upregulate or downregulate circ\_0001018 expression. Using qRT-PCR to measure transfection efficiency, circ\_0001018 was found to be successfully regulated (downregulated by about 70% and upregulated by about 5-fold). Additionally, circ\_0001018 short hairpin RNA (shRNA)1 did not knock down CCT4 expression whereas shRNA2 decreased CCT4 expression by 40% (Figure S1I). Similar to the results of qRT-PCR, a western blot assay showed that shRNA2 reduced the protein expression level of CCT4 by about 60% (Figure S1J). The design of shRNA should span the exon 8 and 10 junction that did not exist in the CCT4 mRNA, so that shRNA could regulate the CCT4 expression. The shRNA2 alters the expression of CCT4 mRNA and protein, and therefore we used circ\_0001018 shRNA1 to perform the follow-up experiments and renamed it as sh-circRNA.

### Silencing hsa\_circ\_0001018 inhibited tumor growth *in vivo*

TPC-1 cells with circ\_0001018 knockdown were injected into the left armpit of nude mice to assess the effect of circ\_0001018 on tumor growth *in vivo*. The small animal live imaging showed that the total radiance flux was reduced by 45% in the circ\_0001018 silencing group compared with the negative control (NC) group (Figures 2A and 2B). The xenografted tumors were also collected and their sizes were measured. The knockdown of circ\_0001018 resulted in smaller tumor sizes compared with the NC group (Figure 2C). Hematoxylin and eosin (H&E) staining showed that silencing circ\_0001018 expression destroyed the structure of tumor tissues (Figure 2D). Ki67 immunohistochemical (IHC) assay results showed that cell proliferation was inhibited by 50% in the circ\_0001018 knockdown group (Figure 2E). These data suggested that circ\_0001018 knockdown inhibited tumor growth *in vivo*.

### Validation of the regulatory relationship between miR-338-3p and hsa\_circ\_0001018

One binding site between miR-338-3p and circ\_0001018 was predicted by the circRNA interactome (Figure 3A). Interestingly, the expression level of miR-338-3p was detected in healthy thyroid tissues and thyroid cancer tissues. In contrast to circ\_0001018, miR-338-3p expression was lower in PTC tissues than in healthy tissues ( $0.52 \pm 0.25$  versus  $1.07 \pm 0.52$ ) (Figure 3B), and the expression level of circ\_0001018 showed a significant inverse correlation with the miR-338-3p expression level in PTC tissues analyzed by Pearson's

**A**

| miRNAid      | miRNAname      | geneID           | chromosome | start    | end      | strand | clipExpNum | RBP                      | merClass |
|--------------|----------------|------------------|------------|----------|----------|--------|------------|--------------------------|----------|
| MIMAT0000763 | hsa-miR-338-3p | hsa circ 0000011 | chr1       | 6676876  | 6676897  | +      |            | 20 AGO1,AGO2,AGO3,AGO4   | 7mer-m8  |
| MIMAT0000763 | hsa-miR-338-3p | hsa circ 0001018 | chr2       | 62100192 | 62100218 | -      |            | 18 AGO1,AGO1-4,AGO2      | 7mer-m8  |
| MIMAT0000763 | hsa-miR-338-3p | hsa circ 0000326 | chr11      | 65272551 | 65272575 | +      |            | 17 AGO1-4,AGO2           | 8mer     |
| MIMAT0000763 | hsa-miR-338-3p | hsa circ 0001199 | chr21      | 45115600 | 45115622 | +      |            | 15 AGO1,AGO1-4,AGO2,AGO3 | 7mer-m8  |
| MIMAT0000763 | hsa-miR-338-3p | hsa circ 0000934 | chr19      | 40581110 | 40581130 | -      |            | 14 AGO1,AGO1-4,AGO2      | 7mer-m8  |

**B**

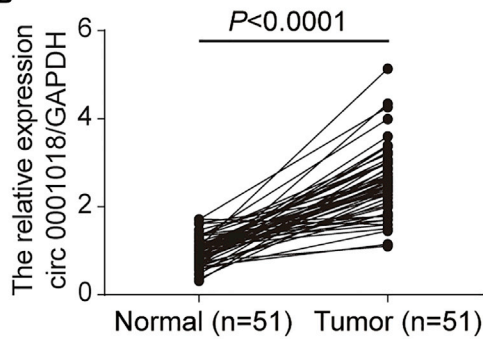

**C**

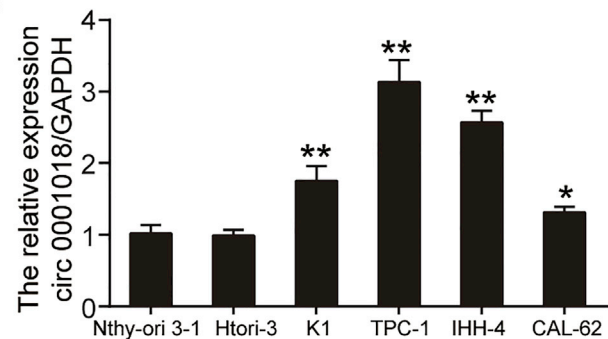

**D**

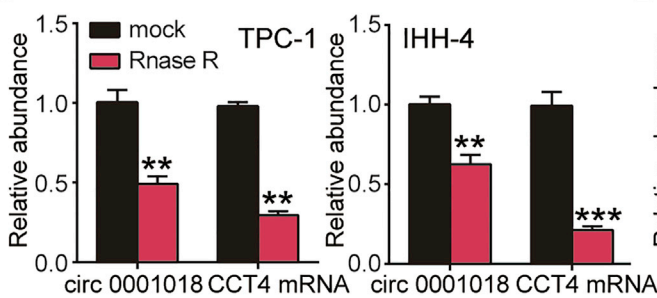

**E**

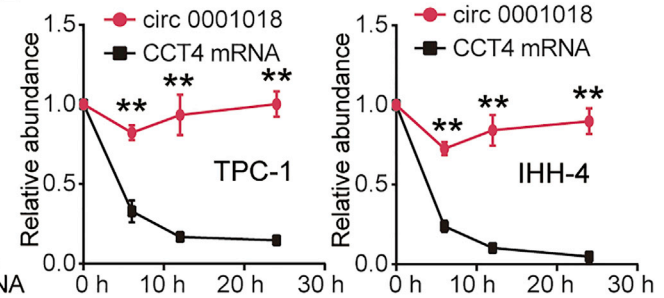

**F**

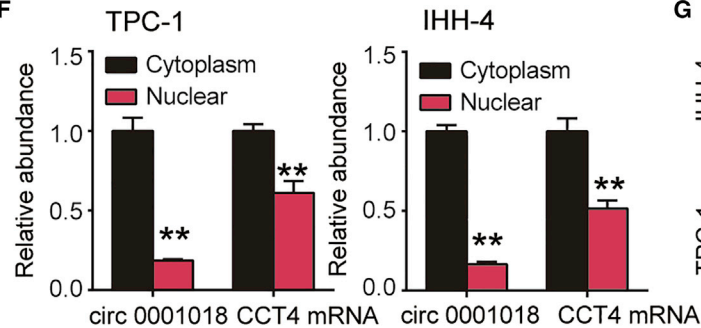

**G**

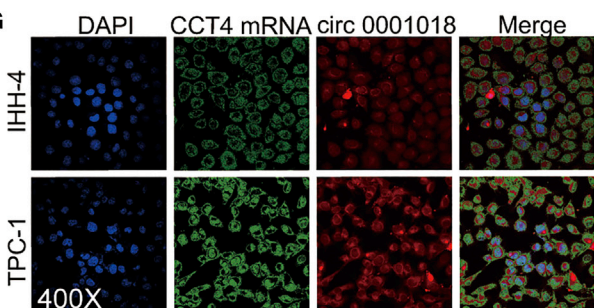

**Figure 1. hsa\_circ\_0001018 was highly expressed in PTC tissues and PTC cell lines**

(A) An ENCORI for RNA interactomes (<http://starbase.sysu.edu.cn/>) algorithm was used to identify the top five most significant circular RNAs (circRNAs) based on the AGO CLIP-seq experiment support. (B) circ\_0001018 levels were detected by RT-PCR in adjacent normal tissues (n = 51) compared with tumor tissue samples (n = 51); GAPDH was used as the standard reference. (C) circ\_0001018 expression levels in PTC cell lines (K1, TPC-1, and IHH-4), a thyroid cell line (CAL-62), and human thyroid follicular epithelial cell lines (child Nthy-ori 3-1 cell line and parent Htori-3 cell line) were analyzed by RT-PCR; GAPDH was used as the reference. \*p < 0.05, \*\*p < 0.01, compared with the Nthy-ori 3-1 cell line. (D) RNase R analysis was used to determine the relative abundance of circ\_0001018 and CCT4 linear mRNA in TPC-1 and IHH-4 cell lines. \*\*p < 0.01, \*\*\*p < 0.001, compared with the mock group. (E) Variation of relative abundance of circ\_0001018 and CCT4 mRNA in TPC-1 and IHH-4 cells during a 1-day incubation. \*\*p < 0.01, compared with linear RNA level. (F) Distribution of circ\_0001018 and CCT4 mRNA in cytoplasm and nuclear fraction in TPC-1 and IHH-4 cells. \*\*p < 0.01, compared with cytoplasm; (G) The subcellular localization of circ\_0001018 and CCT4 mRNA in cells was identified using a FISH assay. Original magnification, ×400. In (C)–(F), data indicate mean ± SD from at least three independent experiments and three repetitions where cellular experiments are indicated.



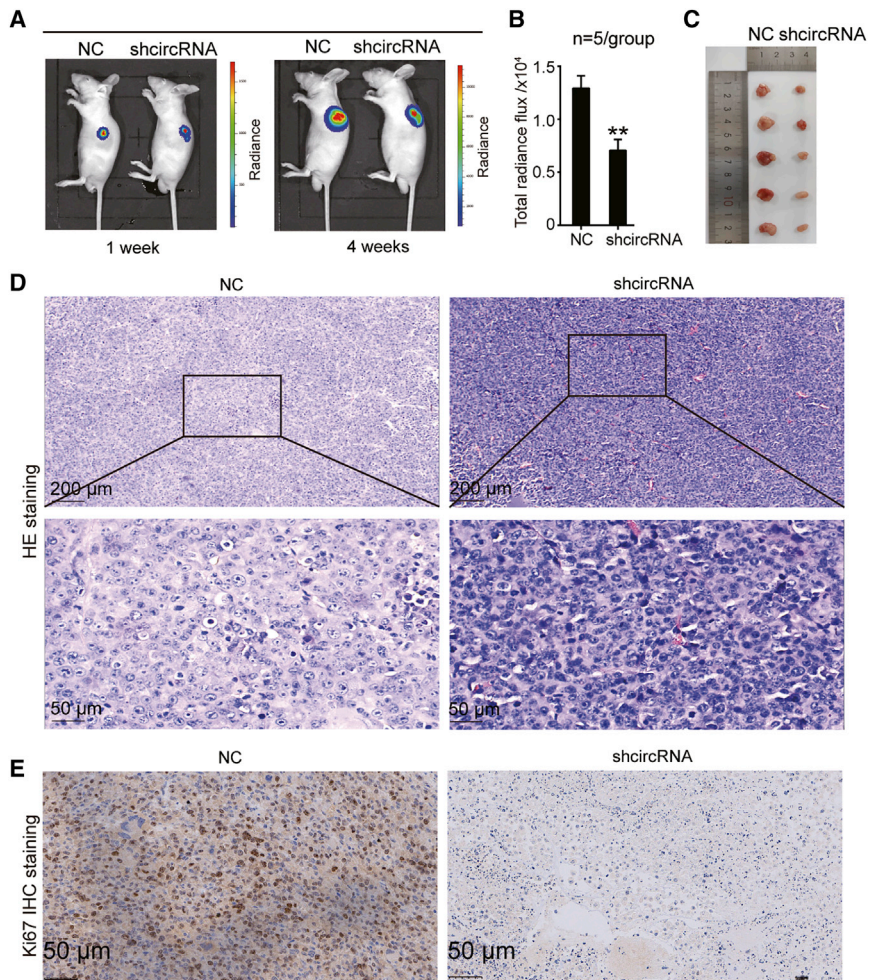

**Figure 2. Knockdown of circ\_0001018 significantly suppressed the growth of tumors *in vivo***

(A) TPC-1 cells with empty vectors (NC) or circ\_0001018 knockdown vectors (sh-circ\_0001018) were injected into nude mice. The representative images were obtained using a small imaging system at week 1 and week 4. (B) The total radiance flux was monitored to represent tumor formation after the mice were injected (for 4 weeks). \* $p < 0.05$ , \*\* $p < 0.01$ , versus the NC group. Data indicate the mean  $\pm$  SD. NC mice = 5, sh-circRNA mice = 5; repetition = 3. (C) Representative images of xenograft tumors obtained from six nude mice. (D) Representative images of H&E pathological staining. (E) The number of proliferating cells were detected by a Ki67 IHC assay. Data indicate the mean  $\pm$  SD. NC mice = 5, sh-circRNA mice = 5; repetition = 3.

and miR-338-3p with an almost 50% decrease were observed in the circ\_0001018-overexpression (OE) group (Figure 3F).

#### hsa\_circ\_0001018 promoted PTC malignancy phenotypes by sponging miR-338-3p *in vitro*

Cell survival was measured by a Cell Counting Kit-8 (CCK-8) assay in TPC-1 and IHH-4 cells transfected with circRNA overexpression vectors (circRNA-OE), sh-circRNA, miRNA inhibitor, or both: the overexpression of circ\_0001018 led to enhanced cell survival at 72 h, silencing circ\_0001018 weakened the survival, while miR-338-3p inhibition strengthened it in TPC-1 and IHH-4 cell lines. When both circ\_0001018 and miR-338-3p were inhibited, the cell survival outcomes were similar to those of the control group (Figure 4A).

The 5-ethynyl-2'-deoxyuridine (EdU) incorporation assay proved that the upregulation of circ\_0001018 enhanced DNA synthesis (reflecting proliferation), the knockdown of circ\_0001018 inhibited DNA synthesis, while the inhibition of miR-338-3p promoted it in both cell lines (Figure 4B). DNA replication occurs in the G<sub>1</sub> phase followed by cell division in nearly all eukaryotes. G<sub>1</sub> phase arrest may suggest an impaired cell mitosis. In our experiments, cells in the G<sub>1</sub> phase were profiled using flow cytometry analysis. We found that the upregulation of circ\_0001018 led to a significantly decreased number of cells in the G<sub>1</sub> phase, circ\_0001018 knockdown led to an increased number of cells arrested in the G<sub>1</sub> phase, whereas miR-338-3p inhibition led to an opposite result. The restore experiments showed the compromising results of knockdown of either circ\_0001018 or miR-338-3p (Figures 5A and 5B). Overexpression of circ\_0001018 significantly inhibited approximately 50% of cell apoptosis, silencing circ\_0001018 dramatically increased apoptosis by nearly 2-fold, while miR-338-3p inhibition caused an opposite result in PTC-1 and IHH-4 cells. When the expression of circ\_0001018 and miR-

correlation analysis (Figure 3C). The luciferase activity was significantly suppressed by miR-338-3p mimics in the circ\_0001018\_wild-type group, but not in the circ\_0001018\_mut group. The luciferase activity was not affected by the miR-338-3p mimic NC (Figure 3D), suggesting that miR-338-3p directly targets wild-type circ\_0001018 from sequence 286 to 292. We used anti-Ago2 RNA immunoprecipitation (RIP) and RT-PCR to analyze the enrichment of circ\_0001018 in TPC-1 and IHH-4 cells. Much more enrichment of circ\_0001018 was seen in the miR-338-3p mimics group with the presence of Ago2 than in the other groups (Figure S2), suggesting that circ\_0001018 could sponge miR-338-3p with the presence of Ago2. A specific inhibitor for miR-338-3p was designed for downregulating the expression of miR-338-3p. RT-PCR results showed that the miR-338-3p inhibitor led to 70% downregulation of miR-338-3p, but it did not affect circ\_0001018 expression (Figure 3E). Alternatively, circ\_0001018 knockdown was realized by the transfection of circ\_0001018 shRNA: after transfection with sh-circ\_0001018, the level of circ\_0001018 was downregulated by 70% and that of miR-338-3p was elevated by approximately 2-fold compared with the NC group; however, circ\_0001018 with an almost 5-fold increase



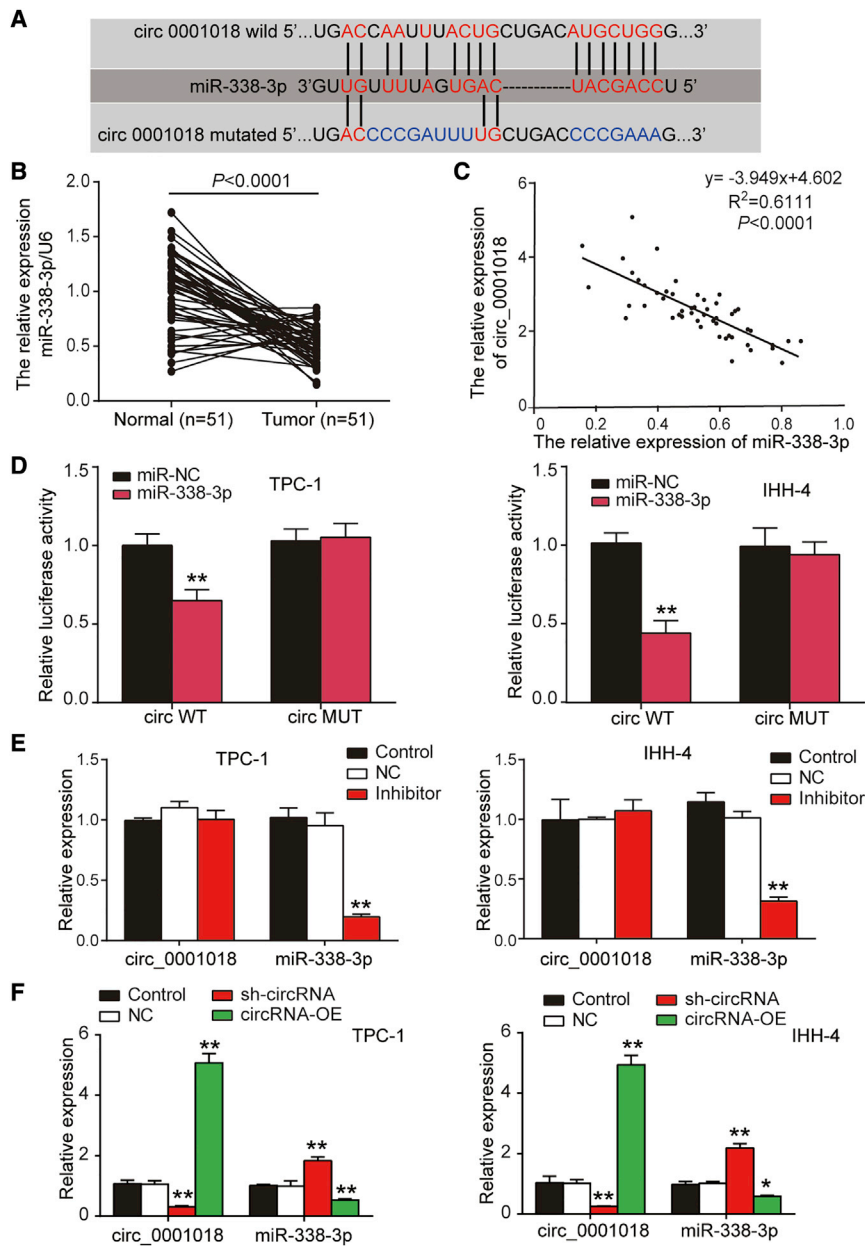

**Figure 3. circ\_0001018 targeted miR-338-3p in TPC-1 and IHH-4 cell lines**

(A) Binding scheme between circ\_0001018 and miR-338-3p is illustrated. The binding sites were predicted using a circRNA interactome database, which uses a TargetScan Human miRNA prediction algorithm. (B) miR-338-3p level was detected by RT-PCR in normal tissues ( $n = 51$ ) compared with tumor tissues ( $n = 51$ ). U6 was used as the reference. (C) The correlation between miR-338-3p and circ\_0001018 expression in PTC tissues was determined by Spearman's correlation analysis. (D) Relative luciferase activity was detected by a reporter assay in TPC-1 and IHH-4 cells. WT, wild-type of circ\_0001018; MUT, mutated-type of circ\_0001018. \*\* $p < 0.01$ , compared with the miR-NC group. (E) The expression of miR-338-3p and circ\_0001018 was determined by RT-PCR in TPC-1 and IHH-4 cells transfected with miR-338-3p inhibitor. \*\* $p < 0.01$ , compared with the control group. (F) The expression of miR-338-3p and circ\_0001018 was determined by RT-PCR in TPC-1 and IHH-4 cells transfected with sh-circRNA and circRNA overexpression vectors (circRNA-OE). \* $p < 0.05$ , \*\* $p < 0.01$ , compared with the control group. Data indicate the mean  $\pm$  SD.  $n = 3$ , repetition = 3.

tion resulted in a more than 50% higher cell migration and invasion rate, circ\_0001018 knockdown resulted in an approximately 30% slower migration and invasion rate in PTC, while miR-338-3p inhibition caused an approximately 40% increase in migrated and invading cell numbers per field. The knockdown of both circ\_0001018 and miR-338-3p restored the migration and invasion to a normal level (Figures 6B and 6C). Finally, the migration- and invasion-associated proteins (E-cadherin, vimentin, and fibronectin) were detected by immunoblot analysis. The results showed that overexpression of circ\_0001018 and miR-338-3p inhibition reduced the protein level of E-cadherin and enhanced the protein level of vimentin and fibronectin, while circ\_0001018 knockdown increased the protein level of E-cadherin and decreased the protein level of vimentin and fibronectin.

338-3p were both inhibited, the cells showed a similar apoptosis rate to the control group (Figure 5C and 5D). The wound-healing assay was used to evaluate cell migration ability. The result showed that the migration rate of the sh-circRNA group decreased by around 80%, while circRNA-OE or the miR-338-3p inhibitor increased the migration rate by approximately 1.8-fold compared with control group. At the same time, the miR-338-3p inhibitor partially eliminated the inhibitory effect of sh-circRNA on migration rate (Figure 6A). Furthermore, we conducted transwell migration and invasion assays to investigate the migration and invasion abilities of PTC cell lines. It was found that circ\_0001018 upregula-

Compared with control group, the levels of migration- and invasion-associated proteins in TPC-1 and IHH-4 cells with co-transfection of sh-circ\_0001018 plus miR-338-3p did not show a significant difference (Figure 6D). These findings suggest that circ\_0001018 could be a significant PTC promoter.

#### Identification of SOX4 as a significant downstream effector of miR-338-3p in PTC

We have conducted bioinformatics analysis on GEO: GSE3678 data series to screen out the overexpressed DEGs (differentially expressed genes). We then uploaded these genes to Metascape, and we found

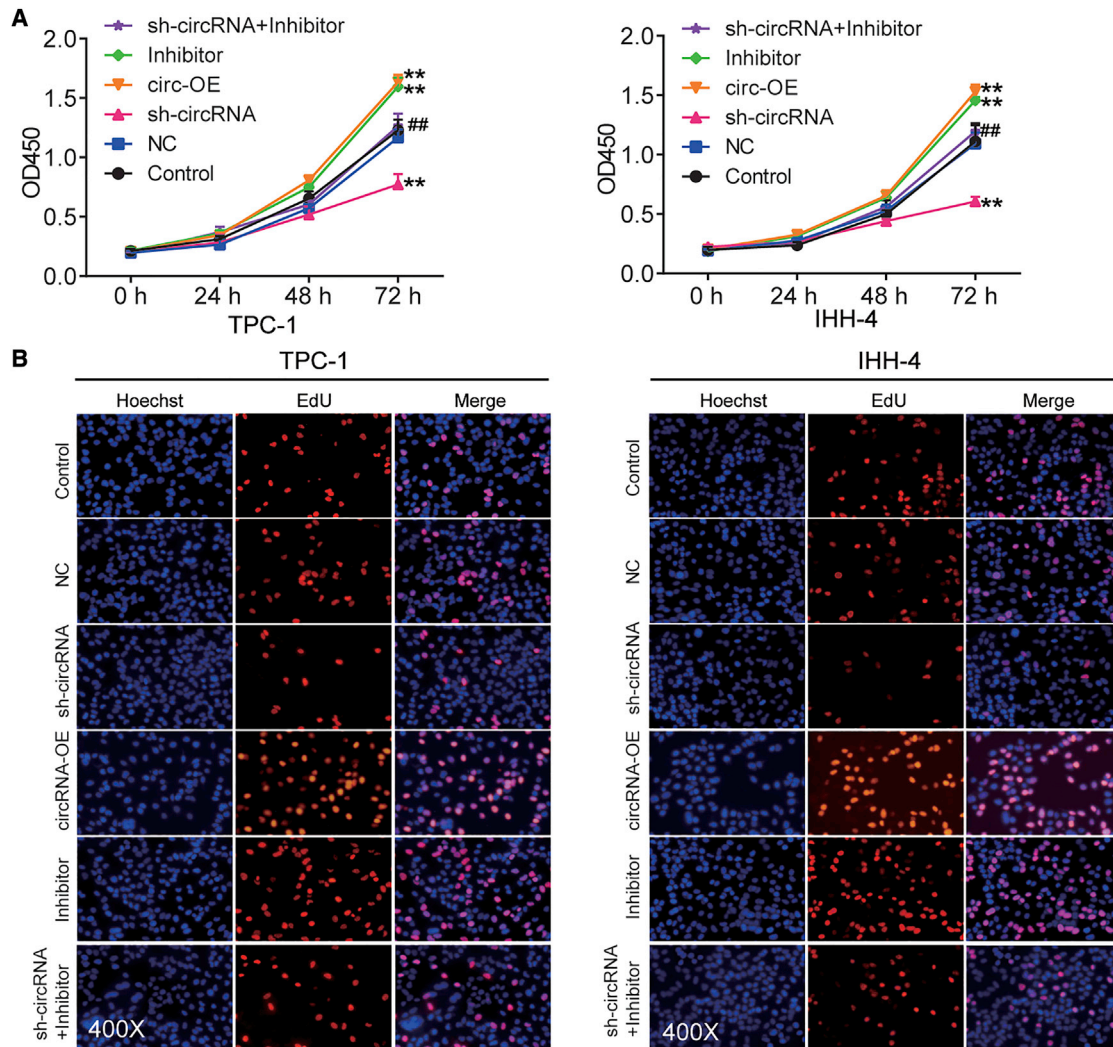

**Figure 4. circ\_0001018 enhanced cell growth in TPC-1 and IHH-4 cells**

(A) Cell survival was determined by a CCK-8 assay in TPC-1 and IHH-4 cells, in which circRNA-OE, sh-circRNA, miR-338-3p inhibitor, or sh-circRNA plus miR-338-3p inhibitor was transfected. OD450, optical density at 450 nm. Data indicate mean  $\pm$  SD from at least three independent experiments and three repetitions. \*\* $p < 0.01$ , versus control; ## $p < 0.01$ , versus sh-circRNA group. (B) An EdU assay was used to detect the cell proliferation in TPC-1 and IHH-4 cells, in which circRNA-OE, sh-circRNA, miR-338-3p inhibitor, or sh-circRNA plus miR-338-3p inhibitor was transfected.

that the significantly enriched Gene Ontology (GO) terms included extracellular matrix-related and G protein-coupled receptor (GPCR) ligand binding-related processes (Figures 7A and 7B). We then obtained the target genes of miR-338-3p from both TargetScan Human 7.2 and miWalk databases. Subsequently, we ran a Meta-scape analysis of the two datasets: GEO: GSE3678 upregulated DEGs and the target genes list of miR-338-3p. We found that extracellular matrix and GPCR-related processes were again enriched (Figures 7C and 7D). We overlapped the GPCR-related gene list, the GEO: GSE3678 overexpressed DEGs list, target genes of miR-338-3p, and the extracellular matrix (ECM)-related genes list, finding out that SOX4, DAB2IP, DGKH, RASA1, MSN, and CBL could be potentially significant genes in PTC pathology (Figure 7E). We de-

tected the enrichment of SOX4, DAB2IP, DGKH, RASA1, MSN, and CBL in TPC-1 and IHH-4 cells transfected with the biotinylated miR-338-3p (bio-miR-338-3p) by an RNA pull-down assay. The results displayed SOX4 with the highest enrichment in bio-miR-338-3p compared with other genes, which was about 85-fold higher (Figure 8A). At the same time, SOX4 was found limitedly reported in PTC in previous studies. Therefore, SOX4 was confirmed as our gene of interest to be investigated in PTC. We then acquired expression data of SOX4 in thyroid cancer from the GEPIA, GEO, and Oncomine databases. GEPIA results showed that SOX4 was significantly overexpressed in thyroid carcinomas (Figure S4A). In GEO: GSE3678 and GSE60542, the expression of SOX4 was significantly higher in tumors than in healthy tissues (Figures S4B and S4C). In GEO:

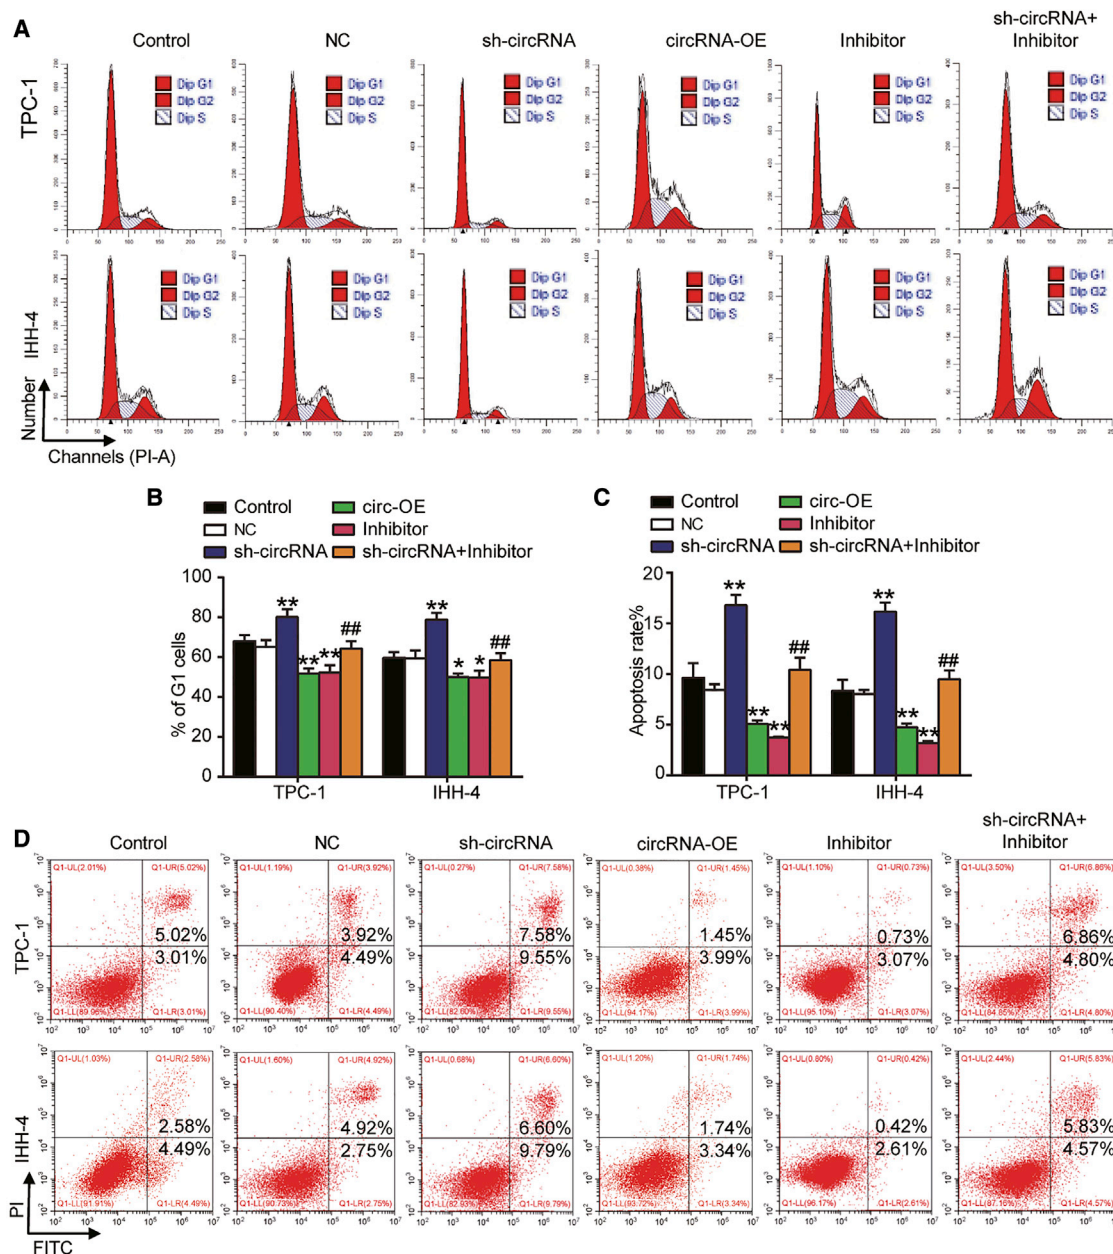

**Figure 5. The knockdown of circ\_0001018 induced cell cycle arrest and promoted cell apoptosis in TPC-1 and IHH-4 cells**

(A and B) Cell cycle profiles of TPC-1 and IHH-4 cell lines were analyzed by flow cytometry. circRNA-OE, sh-circRNA, miR-338-3p inhibitor, or sh-circRNA plus miR-338-3p inhibitor was transfected. Percentage of cells in the G<sub>1</sub> phase is visualized as a bar graph. (C and D) Cell apoptosis was detected using flow cytometry. circRNA-OE, sh-circRNA, miR-338-3p inhibitor, or sh-circRNA plus miR-338-3p inhibitor was transfected. The upper left (UL) quadrant represents necrotic cells, lower left (LL) quadrant living cells, right upper (UR) quadrant late apoptotic and necrotic cells, and the lower right (LR) quadrant represents early apoptotic cells. Data indicate mean ± SD from at least three independent experiments and three repetitions. \*p < 0.05, \*\*p < 0.01, versus control; ##p < 0.01, versus sh-circRNA group.

GSE60542, advanced PTC (stages I, III, and IV; N1 stage) showed a significantly higher SOX4 expression level than that in healthy controls (Figures S4D and S4E). A significantly higher expression of SOX4 was observed in stage III PTC than in normal tissues; however, it was also found to be lower than in stage I PTC. Oncomine data

mining also displayed that SOX4 was significantly higher in thyroid cancer than in the healthy tissues in Giordano thyroid statistics (Figure S4F). Also, in our collected samples, SOX4 mRNA was found at a higher level in thyroid tumor tissues than in the healthy thyroid tissues (Figure 8B). In selected cell lines, SOX4 was found significantly



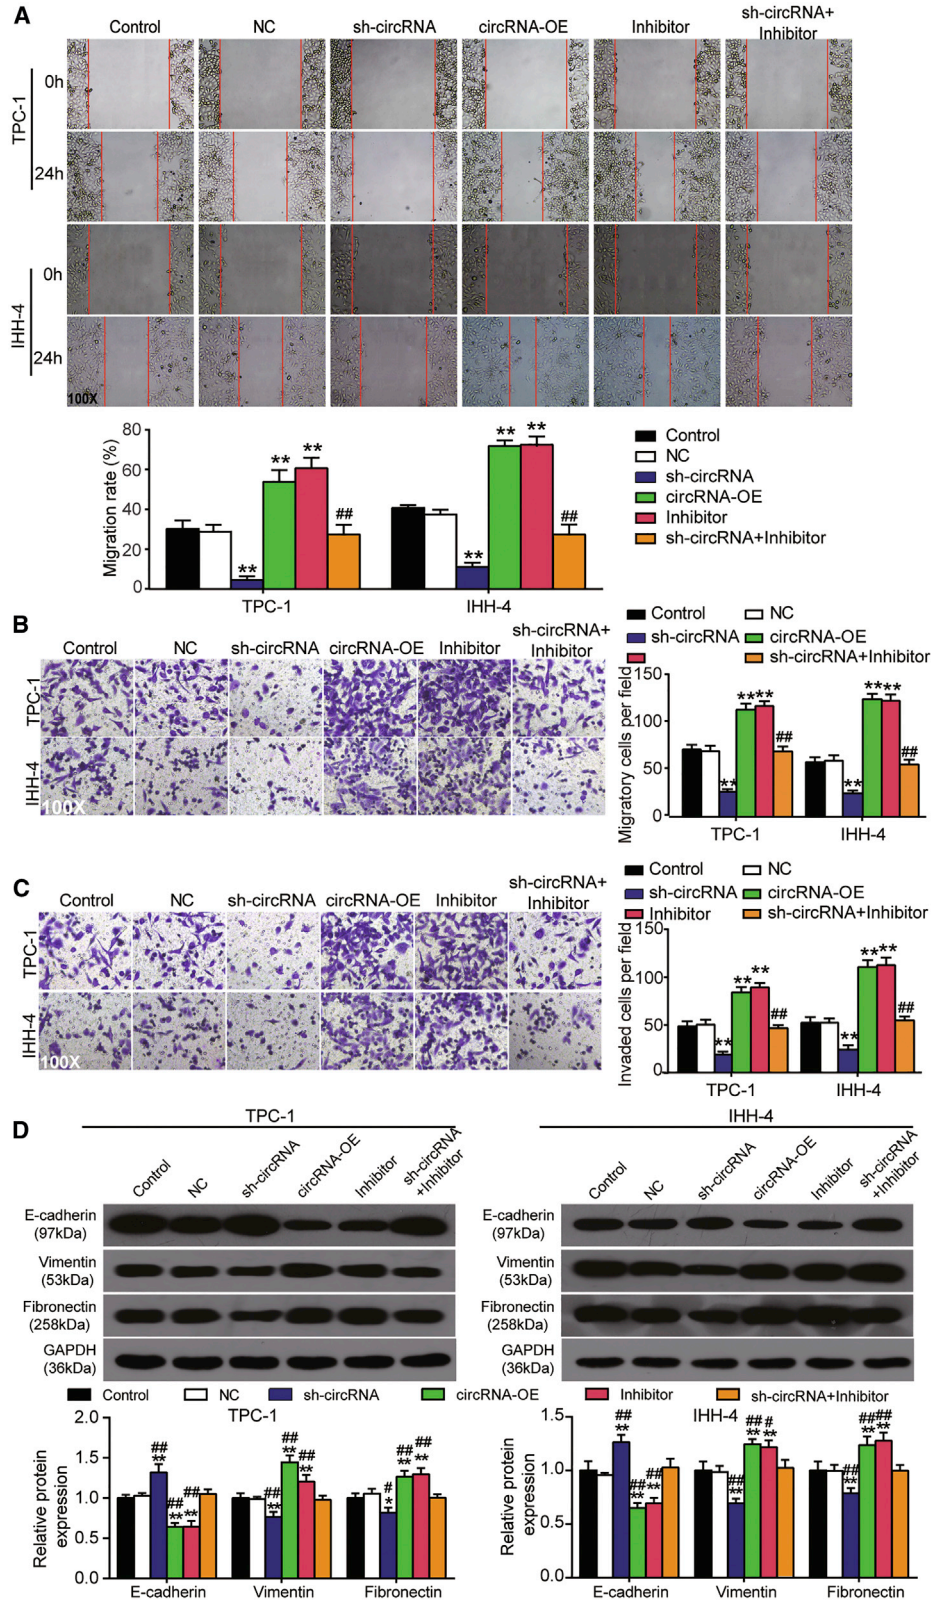

(legend on next page)

upregulated in cancer cell lines than in immortalized ones at both the mRNA and protein levels (Figures 8C and 8D). Furthermore, an inverse correlation between SOX4 and miR-338-3p expression in our collected PTC tissues was found using Pearson's correlation analysis method (Figure 8E).

#### Validation of the complementary relationship between miR-338-3p and SOX4 mRNA

The putative binding scheme between the 3' UTR of SOX4 and miR-338-3p was predicted using TargetScan Human 7.2 and is illustrated in Figure 9A. Wild-type and mutated-type SOX4 mRNA 3' UTR luciferase reporter constructs, together with miR-338-3p mimic or miR-338-3p mimic NC, were transfected into TPC-1 and IHH-4 cell lines. The miR-338-3p mimic significantly inhibited approximately 50% of the luciferase activity of the wild-type but not the mutated-type SOX4 mRNA 3' UTR luciferase reporter constructs (Figure 9B), suggesting that miR-338-3p targeted SOX4 mRNA directly. Before we further studied the effects of miR-338-3p and SOX4, we measured the transfection efficiency of SOX4 overexpression plasmids (SOX4-OE) and miR-338-3p mimic. miR-338-3p mimic transfection caused around a 4-fold increase of miR-338-3p expression (Figure 9C), around a 50% decrease of SOX4 mRNA expression (Figure 9D), and around a 50% decrease of SOX4 protein expression in the two cell lines (Figure 9E). The transfection of SOX4-OE caused an approximate 3-fold increase of SOX4 mRNA expression and a 1.5-fold increase of SOX4 protein expression. The co-transfection of miR-338-3p mimic and SOX4-OE did not show any significant differences of SOX4 mRNA and protein compared with the control group (Figures 9D and 9E). At this stage, we also detected SOX4 protein expression after cells were transfected with sh-circ\_0001018. The results showed that silencing circ\_0001018 down-regulated the SOX4 protein expression by 50% in TPC-1 and IHH-4 cells, while miR-338-3p inhibition upregulated it by 1.25-fold in TPC-1 cells and 1.32-fold in IHH-4 cells. When miR-338-3p inhibition and circ\_0001018 silencing occurred together, the expression of SOX4 protein showed a similar level with the control group (Figure 9F).

#### SOX4 augmented PTC cell survival and mobility

We conducted a CCK-8 assay to measure the survival of cells with SOX4 overexpression and miR-338-3p upregulation. As shown in Figure 10A, the overexpression of SOX4 promoted cell survival dramatically in the two cell lines at 72 h, and miR-338-3p upregulation suppressed the survival to a significantly low level at 72 h. The co-upregulation of miR-338-3p and SOX4 led to significantly better survival than that in the miR-338-3p mimic group but significantly worse survival than that in the SOX4-OE group at 72 h. In the

wound-healing experiment, the upregulation of miR-338-3p reduced the migration rate of PTC cells by about 60%, the upregulation of SOX4 increased the migration rate by about 1.8-fold in TPC cells and 1.3-fold in IHH-4 cells, and the upregulation of SOX4 partially reversed the inhibitory effect of miR-338-3p on the migration rate (Figure 10B). In transwell migration assays, the upregulation of miR-338-3p led to a 53% decrease and 42% decrease in the number of migratory cells in the TPC-1 and IHH-4 cell lines, respectively; the upregulation of SOX4 resulted in a 42% and 41% increase in the number of migratory cells in the TPC-1 and IHH-4 cell lines, respectively; additionally, the co-upregulation of miR-338-3p and SOX4 resulted in an approximately equal level with that in the control group (Figure 10C). In the transwell invasion assay, miR-338-3p mimic transfection weakened the invasion by approximately a third, whereas SOX4-OE transfection enhanced the invasion by around 2-fold in the two cell lines. The co-transfection of mimic and SOX4-OE resulted in an even level with the control group (Figure 10D). After detection of migration and invasion associated proteins, the protein level of E-cadherin increased by around 1.5-fold in the miR-338-3p mimic group and decreased by approximately 50% in the SOX4-OE group, while the protein levels of vimentin and fibronectin decreased by almost 50% in the miR-338-3p mimic group and increased by 1.3-fold in the SOX4-OE group. However, co-transfection of the miR-338-3p mimic and SOX4-OE did not significantly affect the protein levels of E-cadherin, vimentin, and fibronectin compared with the control (Figure 10E). From these results, we can conclude that the phenotype changes caused by the miR-338-3p mimic can be reversed by SOX4 overexpression, suggesting that miR-338-3p directly regulates SOX4, thus affecting PTC cell aggression.

#### DISCUSSION

In our previous studies, we confirmed the tumor suppression effect of miR-338-3p in human PTC.<sup>21,26</sup> In this study, we identified a novel downstream target gene, SOX4, and a novel upstream regulator, hsa\_circ\_0001018. We then studied the effects of circ\_0001018, miR-338-3p, and SOX4 in PTC. We found that circ\_0001018 enhanced tumor growth and tumor cell aggression by sponging miR-338-3p, which thereby released SOX4 mRNA. We thus concluded that the novel upstream regulator circ\_0001018 and the downstream effector SOX4 could be potential oncogenes in PTC.

Aberrant miR-338-3p expression has been reported to affect the phenotypes of tumor cells in human cancers, e.g., thyroid cancer, liver cancer, gastric cancer, and neuroblastoma.<sup>27-30</sup> Specifically, Huang and colleagues<sup>27</sup> once reported that miR-338-3p targeted SMO to suppress

#### Figure 6. hsa\_circ\_0001018 promoted cell migration and invasion in TPC-1 and IHH-4 cells

(A) A wound-healing assay was performed in TPC-1 and IHH-4 cells, in which circ\_0001018 overexpression, sh-circ\_0001018, miR-338-3p inhibitor, or sh-circ\_0001018 plus miR-338-3p inhibitor was transfected. Bar graphs were drawn using the derived data. (B) A transwell migration assay was performed in TPC-1 and IHH-4 cells, in which circ\_0001018 overexpression, sh-circ\_0001018, miR-338-3p inhibitor, or sh-circ\_0001018 plus miR-338-3p inhibitor was transfected. Bar graphs were drawn using the derived data. (C) Cell invasion was assessed using a transwell invasion assay. Bar graphs were drawn to show the number of invading cells in every group. (D) The protein levels of E-cadherin, vimentin, and fibronectin were detected by immunoblot analysis. Data are in the format of mean  $\pm$  SD. n = 3, repetition = 3. \*p < 0.05, \*\*p < 0.01, versus control; #p < 0.05, ##p < 0.01, versus sh-circRNA group.

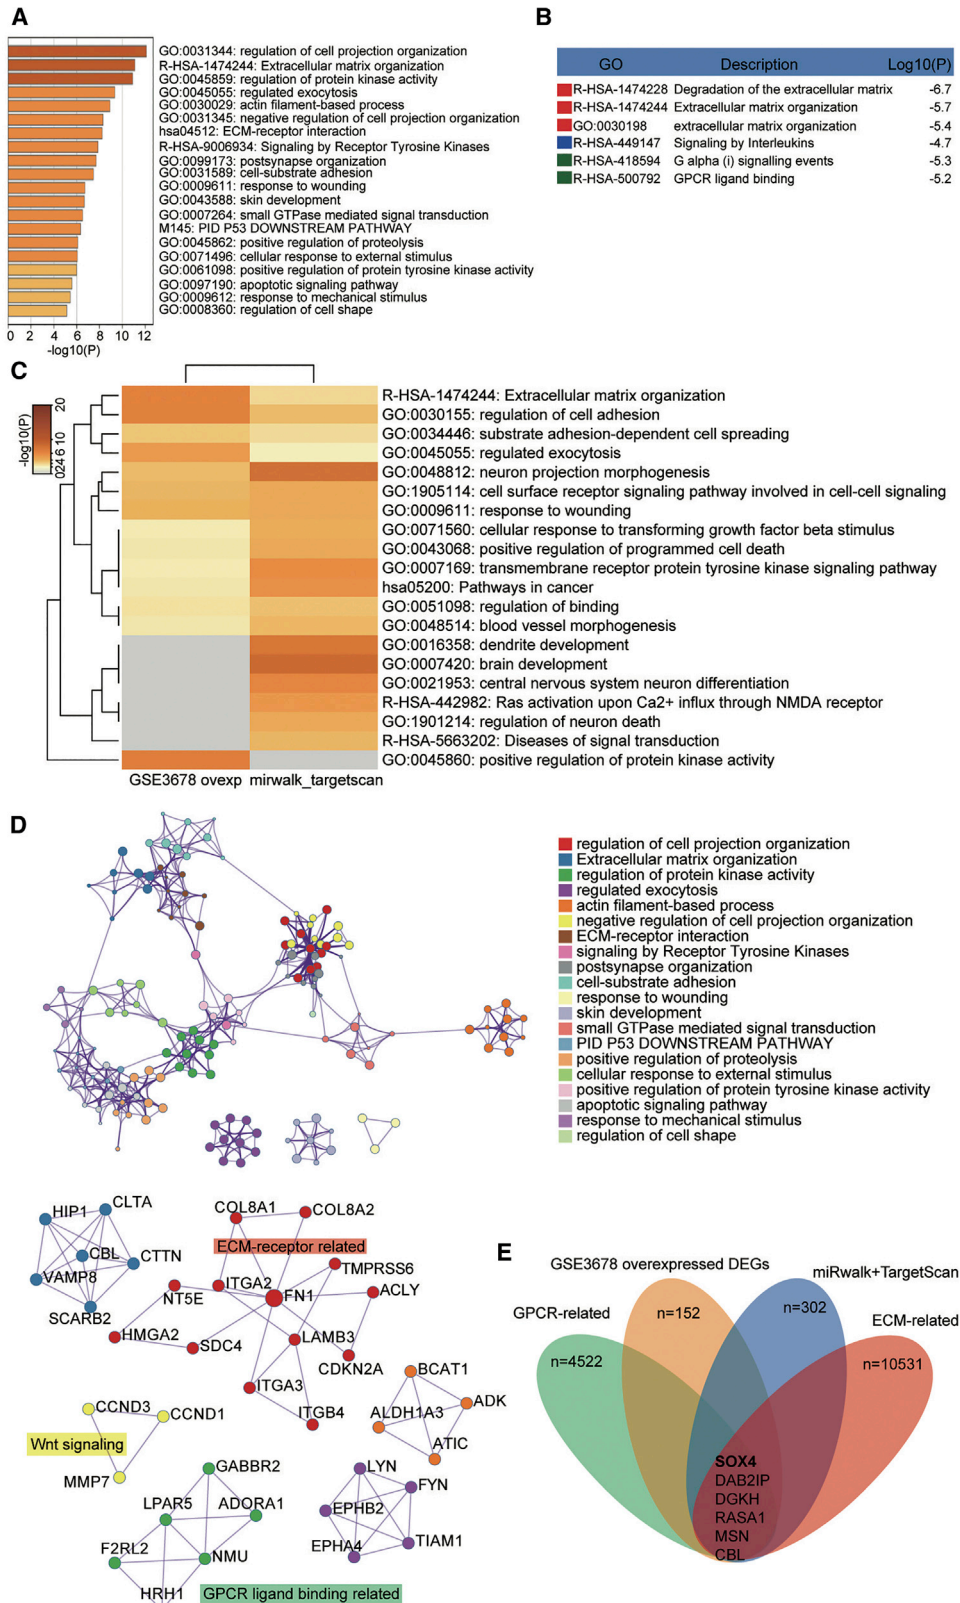

(legend on next page)



canceration of liver cancer cells, inspiring a novel therapy method for the treatment of liver cancer. Chen et al.<sup>28</sup> reported that miR-338-3p suppressed cell propagation and mobility by regulating the expression of PREX2a. Together with our previous and current studies, miR-338-3p could be a tumor suppressor in PTC, and possibly a universal tumor suppressor in human cancers, which could be an interesting topic. In addition, miR-338-3p has been reported to interact with circRNAs in various cancers such as nasopharyngeal carcinoma,<sup>31</sup> cervical cancer,<sup>20</sup> hepatocellular carcinoma,<sup>32</sup> colon cancer,<sup>33</sup> lung cancer,<sup>19,34</sup> and breast cancer.<sup>35</sup> In our previous studies, we used TPC-1 cells stably expressing miR-338-3p to inject male BALB/mice and found that forced expression of miR-338-3p inhibited tumorigenesis.<sup>21</sup> In all of the interactions, miR-338-3p was reported to be sponged by the circRNAs and acted as a tumor suppressor. We herein report a novel circRNA, circ\_0001018, that also sponged miR-338-3p to promote PTC development. The role of circ\_0001018 in human cancers has not been studied, including in PTC. In addition, we identified a novel downstream effector of miR-338-3p, SOX4. The study of the miR-338-3p-SOX4 axis has been reported in lung cancer,<sup>36</sup> breast cancer,<sup>37</sup> renal cell carcinoma,<sup>38</sup> and idiopathic pulmonary fibrosis.<sup>39</sup> To our knowledge, this is the first report of miR-338-3p and SOX4 in PTC. miR-338-3p fulfilled its tumor-suppressing function in PTC cells by suppressing SOX4. Our study contributes to the comprehension of the competing endogenous RNA (ceRNA) network that involves miR-338-3p in PTC.

An increasing number of circRNAs have been defined and reported, and many of them have been found to be important in tumor pathology; for example, some of the circRNAs have been correlated with prognosis of human PTC. For instance, Ren et al.<sup>40</sup> reported that hsa\_circRNA\_047771 and hsa\_circRNA\_007148 might be potential prognostic biomarkers for PTC. Lan et al.<sup>41</sup> reported that downregulation of hsa\_circ\_0137287 predicted aggression of papillary thyroid carcinoma. In addition, upregulation of hsa\_circ\_0067934 was correlated with thyroid carcinoma malignancy.<sup>42</sup> Several other groups also reported a plethora of circRNAs to be potential PTC biomarkers.<sup>40,43–46</sup> Furthermore, there are other studies revealing that circRNAs can interfere with tumor cell activities by sponging miRNAs. A wide spectrum of circRNAs are cleaved and spliced by exons in the known protein-coding genes. Because of the back-splicing mechanism, circRNAs are rich in exposed exon sequences, allowing the complementary pairing of miRNAs, which therefore suppresses the activity of miRNAs.<sup>47,48</sup> A previous study revealed that circ-ITCH overexpression in PTC tissues suppressed the proliferation and invasion of the cells while promoting apoptosis by sponging miR-22-3p and freed CBL mRNA.<sup>17</sup> It was also reported that hsa\_circ\_0058124 knockout impaired proliferation and mobility, but induced apoptosis, in K1 and TPC-1 cell lines and in nude mice models by functioning as a ceRNA of miR-218-5p, therefore restraining NUMB mRNA *in vitro* and *in vivo*.<sup>49</sup> hsa-

circ\_0025033 was also proven to facilitate cell survival, proliferation, and mobility progression, but it suppressed the apoptosis of TPC-1 and K1 cell lines by sponging miR-1231 and miR-1304.<sup>50</sup> circ-ZFR contributes to TPC-1 and SW579 (a thyroid gland squamous cell carcinoma cell line) cell proliferation and invasion by sponging miR-1261, therefore releasing C8orf4 mRNA.<sup>51</sup> circRNA\_NEK6 was reported to promote TPC-1 cell proliferation by sponging miR-370-3p.<sup>52</sup>

These studies confirmed that circRNAs could be active facilitators of human PTC by sponging their target miRNAs. In this study, we found that circ\_0001018 could act as a sponge of miR-338-3p, harboring the miRNA and thereby attenuating the suppressive function of miR-338-3p on SOX4 in TPC-1 and IHH-4 cell lines. The knockdown of circ\_0001018 significantly suppressed tumor malignancy and tumor cell phenotypes.

In the last 5 years, SOX4 has been extensively studied in various human cancers, including oral cancer, breast cancer, ovarian cancer, and lung cancer, among others,<sup>53–56</sup> especially lung cancer. For instance, SOX4 was reported to be targeted by miR-363-3p to inhibit non-small cell lung cancer cell invasion.<sup>57</sup> Zhong et al.<sup>58</sup> reported in 2019 that SOX4 was upregulated by lncRNA OR3A4, potentially predicting poor clinical outcomes of patients with non-small cell lung cancer. However, SOX4 has not been studied in human papillary cancer. This research was thus conducted to fill this gap. We found that miR-338-3p directly targeted SOX4 mRNA and suppressed its expression. The forced overexpression of SOX4 induced cell survival, proliferation, and mobilities of TPC-1 and IHH-4 cell lines. From another perspective, when studying the SOX4-circRNA feedback loop, Ding's team<sup>59</sup> reported in 2019 that circ-DONSON promoted gastric cancer cell invasion by recruiting the NURF complex to the promoter region of SOX4, thus activating SOX4 transcription. In our study, SOX4 was in a ceRNA network that involves circ\_0001018 and miR-338-3p: circ\_0001018 promoted the neoplastic phenotypes of the PTC cells by sponging miR-338-3p, thus releasing SOX4 and resulting in an elevated SOX4 level. Taken together, we think that SOX4 can be a solid facilitator of PTC cancer genesis. Our study not only provided insights into the tumor-promoting role of SOX4 in PTC, but it also identified a novel ceRNA network involving SOX4 in PTC.

However, there are still some concerns that need to be addressed in the future. On the one hand, the study on the downstream signaling pathway of SOX4 could go deeper. On the other hand, commercial drugs are often used to treat PTC, such as cabozantinib<sup>60</sup> and anlotinib.<sup>61</sup> Therefore, it is important to explore the effect of the circ\_0001018/miR-338-3p/SOX4 axis on the specific drugs for the treatment of PTC.

#### Figure 7. SOX4 was identified to be a significant downstream effector of miR-338-3p in PTC

(A and B) GO term enrichment of GEO: GSE3678 overexpressed DEGs using a Metascape algorithm. (C and D) Comparison of GO term enrichment between GEO: GSE3678 overexpressed DEGs and target genes of miR-338-3p using a Metascape algorithm. The results are presented in a histogram (C) and an interaction network (D). (E) Overlap of GEO: GSE3678 overexpressed DEGs, GPCR-related genes, target genes of miR-338-3p, and extracellular matrix-related genes.

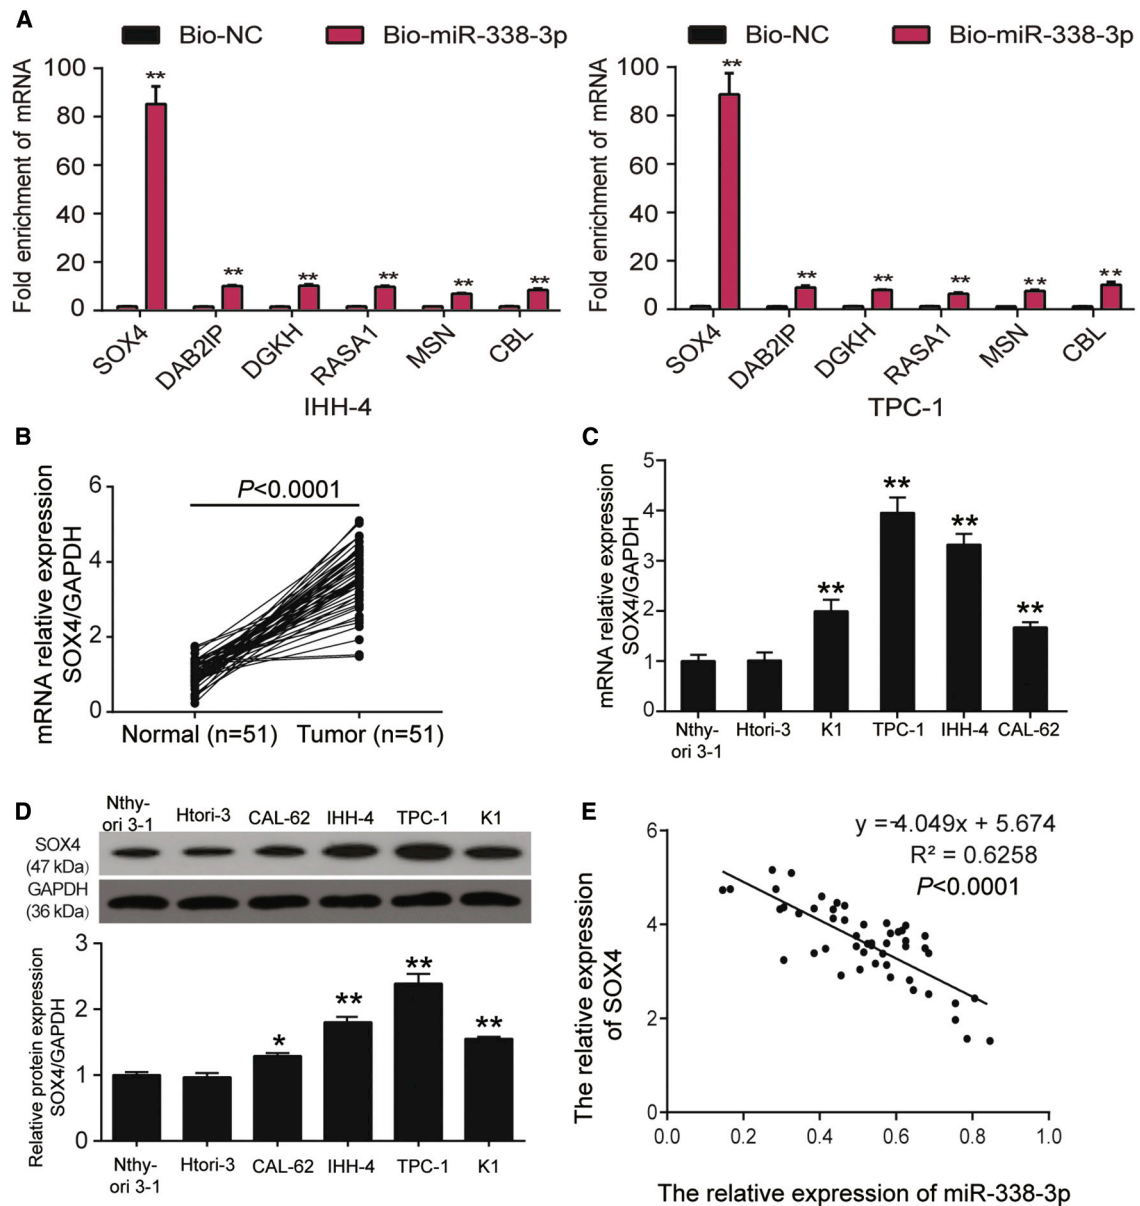

**Figure 8. SOX4 was detected to express more in tumor tissues than the normal**

(A) The enrichment of SOX4, DAB2IP, DGKH, RASA1, MSN, and CBL using RT-PCR in the sample pulled down by biotinylated miR-338-3p. \*\* $p < 0.01$ , compared with biotinylated NC (Bio-NC). Data indicate the mean  $\pm$  SD.  $n = 3$ , repetition = 3. (B) The relative expression of SOX4 mRNA was detected by RT-PCR in normal ( $n = 51$ ) and tumor tissues ( $n = 51$ ). GAPDH was used as the reference. (C) Relative expression of SOX4 mRNA in cell lines (Nthy-ori3-1, Htori-3, K1, TPC-1, CAL-62, IHH-4) was analyzed by RT-PCR. GAPDH was used as a standard. (D) Relative expression of SOX4 protein in cell lines (Nthy-ori3-1, Htori-3, K1, TPC-1, CAL-62, IHH-4) was analyzed by western blot. GAPDH was used as a standard. (E) The correlation between miR-338-3p and SOX4 mRNA expression in PTC tissues was determined by Spearman's correlation analysis. \* $p < 0.05$ , \*\* $p < 0.01$ , compared with Nthy-ori 3-1. Data indicate the mean  $\pm$  SD.  $n = 3$ , repetition = 3.

## Conclusions

Our study demonstrated that circ\_0001018 promoted tumor growth *in vivo*, and it enhanced the malignant phenotypes of PTC cells via sponging miR-338-3p to release SOX4. Our findings might provide a new target for the treatment of PTC.

## MATERIALS AND METHODS

### Clinical tissue samples

Clinical PTC and adjacent healthy tissues were collected from patients diagnosed with PTC in the China-Japan Union Hospital of Jilin University Hospital. No radiotherapy, chemotherapy, or other

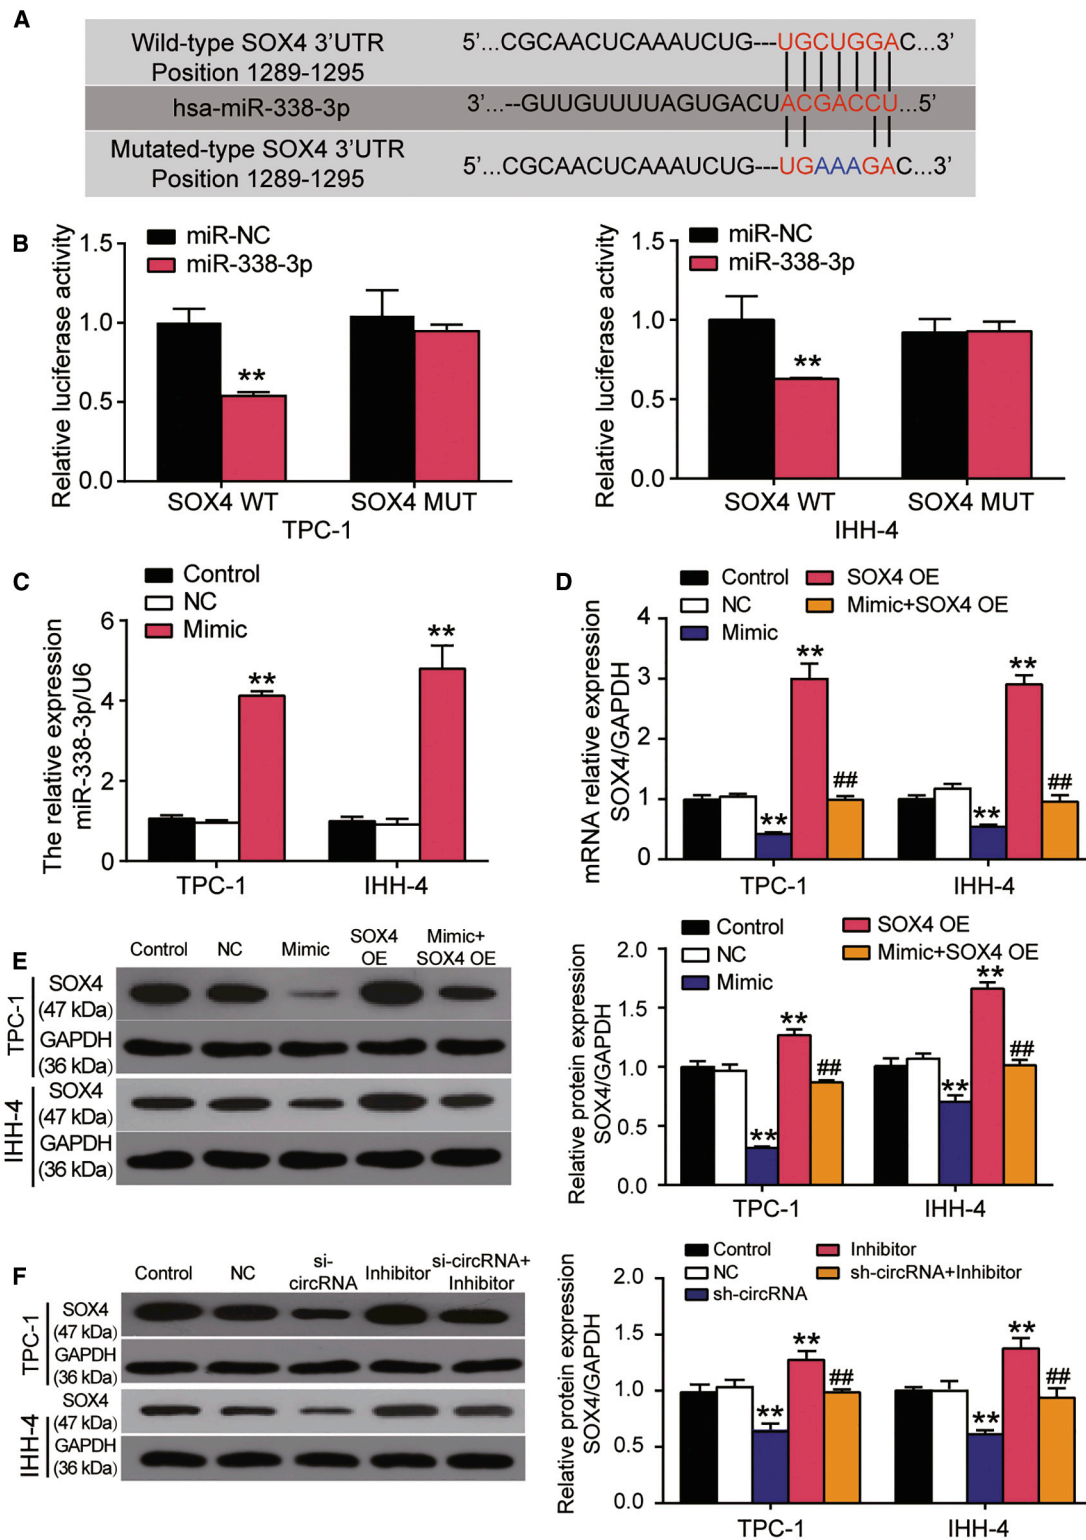

**Figure 9. miR-338-3p directly targeted SOX4 mRNA in TPC-1 and IHH-4 cell lines**

(A) The complementary pairing between wild-type miR-338-3p and 3' UTR of SOX4 is illustrated based on a TargetScan Human 7.2 algorithm. The mutated type of the SOX4 3' UTR represents a mismatched pairing with wild-type miR-338-3p in three positions. (B) Relative luciferase activity was detected by a luciferase reporter assay in TPC-1 and

(legend continued on next page)



adjuvant therapies had been introduced. 51 pairs of tissue samples were collected followed by liquid nitrogen freezing and storage at  $-80^{\circ}\text{C}$ . 51 PTC tissues and 51 adjacent healthy tissues were used for the analysis. The analysis of the tissue sample was authorized by the patients and approved by the Ethics Committee of the hospital. The baseline characteristics of all participants are presented in Table S1.

#### Cell lines and cell culture

Human PTC cell lines K1, IHH-4, and TPC-1, human thyroid gland undifferentiated carcinoma cell line CAL-62, as well as immortalized human thyroid follicular epithelial cell lines Nthy-ori 3-1 (child cell line) and Htori-3 (parent cell line) were used in this study. K1, IHH-4, TPC-1, Nthy-ori3-1, and Htori-3 cell lines were purchased from BNCC (Beijing, China). The CAL-62 cell line was purchased from the Chinese Academy of Sciences (Shanghai, China). The Nthy-ori3-1 cell line was cultured in RPMI 1640 medium with 10% fetal bovine serum (FBS). TPC-1, K1, CAL-62, and IHH-4 cell lines were kept in 90% DMEM-H + 10% FBS. The Htori-3 cell line was kept in 90% F-12K medium + 10% FBS. The TPC-1 cell line was derived from a differentiated thyroid gland papillary carcinoma,<sup>62</sup> and it harbored the RET/PTC1 gene rearrangement.<sup>63</sup> The TPC-1 cell line has been confirmed to be a thyroid cancer cell line that represents PTC.<sup>64,65</sup> It is a highly characterized model for thyroid cancer research. The IHH-4 cell line was from a metastasis (site: left cervical lymph node) of a differentiated thyroid gland papillary carcinoma, and it is highly metastatic.<sup>66</sup> In addition, previously published work has regularly used these two cell lines in diverse pathogenesis and progression studies.<sup>49,67–72</sup>

#### Nude mice xenograft assay (a live imaging method with tumor tissue pathology analysis)

Male BALB/c nude mice (at 4 weeks of age) were purchased from Beijing Vital River Laboratory Animal Technology and randomly assigned to the sh\_circRNA\_0001018 group ( $n = 5$ ) and NC group ( $n = 5$ ). TPC-1 cells stably transfected with sh-circRNA\_0001018 or empty vector were suspended in PBS. 100  $\mu\text{L}$  of cell suspension (approximately  $1 \times 10^8$  cells/mL) was injected into the left armpit of the nude mice. A small animal imaging system was used to monitor the tumor growth in a 4-week-long time course. Fluorescence images were obtained at week 1 and week 4. Finally, the nude mice were killed at week 4, and the tumors were resected and subjected to H&E pathologic analysis and Ki67 IHC staining. Experiments were approved by the Institutional Animal Care and Use Committee of the hospital.

#### Luciferase reporter gene assay

The complementary relationship between hsa\_circ\_0001018 and miR-338-3p was predicted using the ENCORI for RNA interactomes algorithm. TargetScan Human 7.2 and miRWalk algorithms were used to predict the complementary sequences between miR-338-3p and SOX4 mRNA. To construct luciferase reporter vectors, the sequences of circ\_0001018 and the SOX4 mRNA 3' UTR that are complementary to miR-338-3p were amplified by PCR and cloned into the pmirGLO Dual-Luciferase vector. TPC-1 and IHH-4 cells were transfected with approximately 50 ng of the corresponding vectors together with approximately 25 ng of miR-338-3p mimic or the mimic control. Lipofectamine 3000 reagent (Invitrogen, Carlsbad, CA, USA) was used for transfection. The Dual-Luciferase reporter assay system (Promega, Fitchburg, WI, USA) was used to detect the luciferase activity 2 days afterward. The ratio of firefly to Renilla luciferase was calculated.

#### Cell transfection

circ\_0001018 shRNA, circ\_0001018 overexpression vectors, SOX4 overexpression vectors, miR-338-3p mimic, and miR-338-3p inhibitor were purchased from GenePharma (Shanghai, China). For the construction of the circ\_0001018 overexpression and SOX4 overexpression vectors, the full length of circ\_0001018 and SOX4 was amplified by PCR, and the primers containing BamHI and XhoI sites were designed. Next, the full length of circ\_0001018 and the full-length of SOX4 were inserted into pLCDH-cir (GenePharma, China) and pcDNA3.1 (GenePharma, China), respectively, at the BamHI and EcoRI sites. Finally, puromycin was used to select the transfected cells. As for circ\_0001018 shRNA, two shRNAs for knockdown of circ\_0001018 were designed, synthesized, and inserted between the BamHI and EcoRI sites of the pLV-CMV-puro-U6-shRNA lentiviral vector. Puromycin also used to screen out the transfected cells. The sequences of circ\_0001018 shRNA (sh-1 and sh-2), circRNA-OE, miR-338-3p mimic, and miR-338-3p inhibitor are given in Table S2. The cell transfection was performed using circ\_0001018 shRNA (sh-1 and sh-2), circ\_0001018 overexpression vectors, SOX4 overexpression vectors, miR-338-3p mimic, and miR-338-3p inhibitor. After transfection for 48 h using Lipofectamine 3000 (Invitrogen), the transfected cells were collected to assess the transfection efficiency by qRT-PCR.

#### Quantitative PCR analysis

TRIzol reagent (Invitrogen) was used for RNA isolation from tissues and cell lines. The SuperScript IV first-strand synthesis system

IHH-4 cells. \*\* $p < 0.01$ , compared with miR-NC group, in which group the cells were transfected with only the transfection reagent. (C) The transfection efficiency of miR-338-3p mimics was determined by RT-PCR in TPC-1 and IHH-4 cells. U6 was used as the reference. (D) The expression of SOX4 mRNA was determined by qRT-PCR in TPC-1 and IHH-4 cells transfected with miRNA mimic, SOX4 overexpression plasmids, or co-transfected with both. GAPDH was used the reference gene. \*\* $p < 0.01$ , versus control; ## $p < 0.01$ , compared with the mimic group. (E) The relative expression of SOX4 protein was detected by western blotting in TPC-1 and IHH-4 cell lines transfected with miRNA mimic, SOX4 overexpression plasmids, or co-transfected with both. GAPDH was used as the reference. \*\* $p < 0.01$ , versus control; ## $p < 0.01$ , compared with the mimic group. (F) The expression of SOX4 protein in both cell lines transfected with circ\_0001018 shRNA, miR-338-3p inhibitor, or both was detected using the immunoblotting method. \*\* $p < 0.01$ , versus control; ## $p < 0.01$ , versus the sh-circRNA group.  $n = 3$ , repetition = 3. Data indicate mean  $\pm$  SD. Statistical analysis was done using one-way ANOVA except for the luciferase assay, in which the Student's *t* test was used. OE, overexpression; mimic, miR-338-3p mimic; sh-circRNA, circ\_0001018 shRNA; inhibitor, miR-338-3p inhibitor.

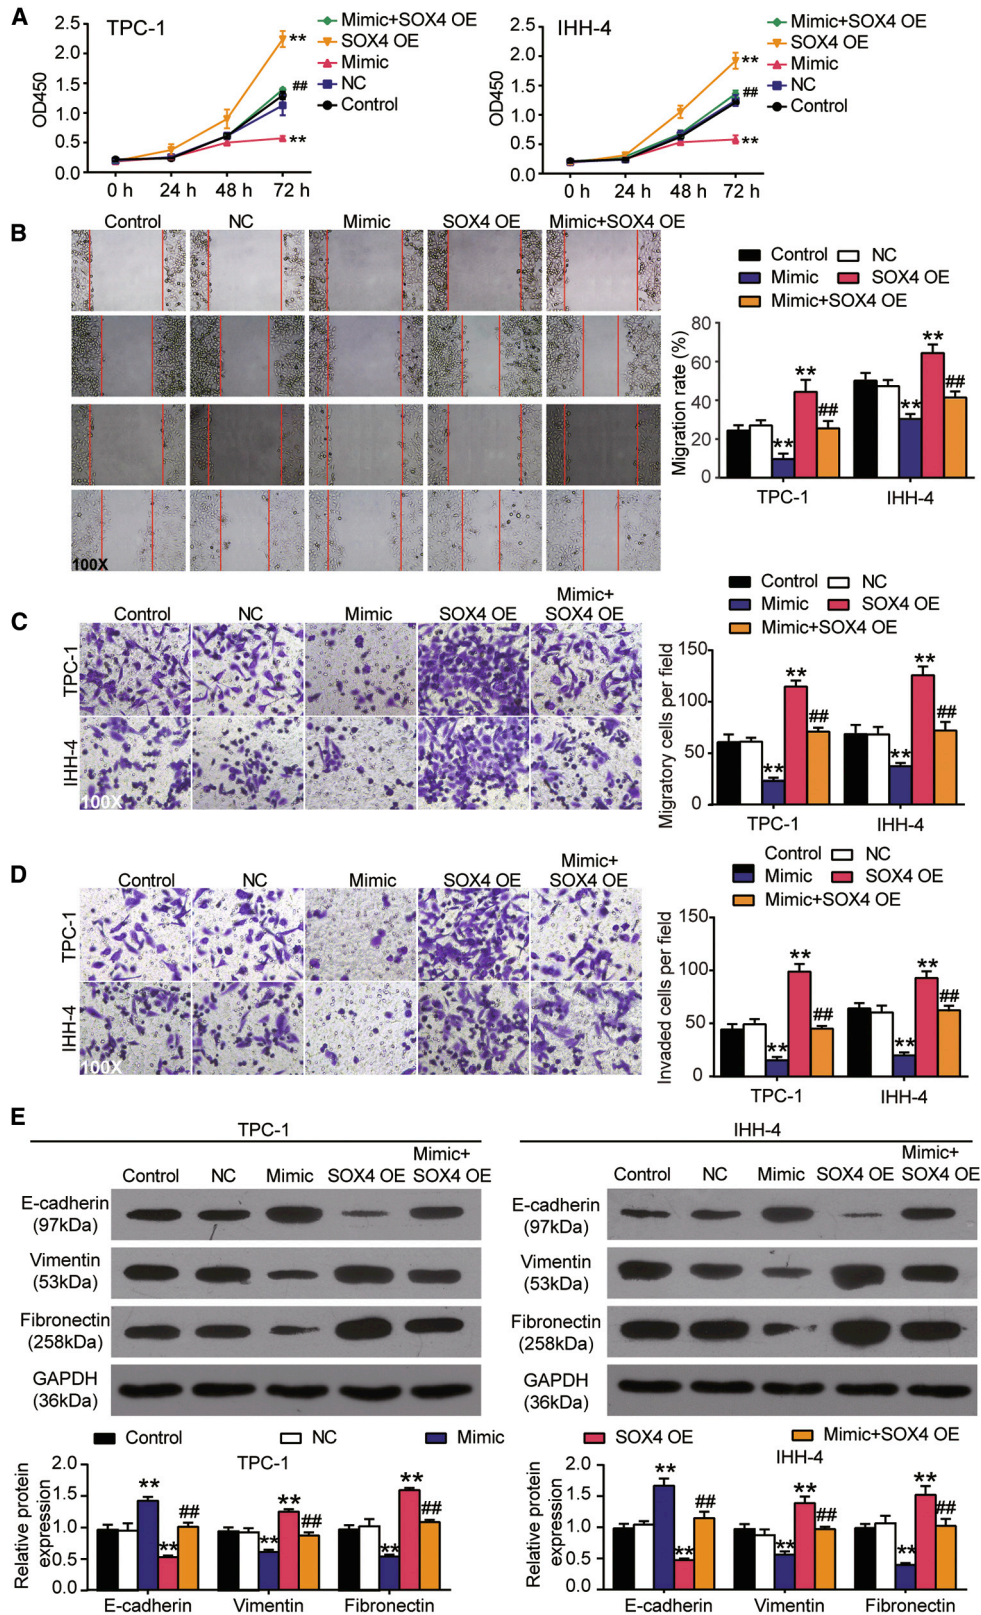

(legend on next page)

(Thermo Fisher Scientific, USA) was used for cDNA synthesis from 1  $\mu$ g of total RNA. A One Step PrimeScript RT-PCR kit (TaKaRa, Tokyo, Japan) was mixed with cDNA for fluorescence quantitative PCR. The primer sequences are shown in Table S3. circ\_0001018 was amplified from cDNA by divergent primers (an expected 85-bp fragment).

#### Half-life detection

To detect the half-life of circ\_0001018 and its linear mRNA counterpart, the TPC-1 and IHH-4 cells were incubated with 5  $\mu$ g/mL actinomycin D (ActD) (a transcription inhibitor) for 0, 10, 20, and 30 h. After incubation, the cells were collected, and the total RNA was isolated from the collected cells using TRIzol reagent. The half-life of circ\_0001018 and its linear mRNA was detected using qRT-PCR.

#### Immunoblot analysis

50  $\mu$ g of protein samples from lysed cells went through 10% SDS-PAGE before transfer to nitrocellulose membranes. The membranes were blocked with skim milk for 2 h. Thereafter, the primary antibodies against SOX4 (1:1,000, catalog no. ab80261, Abcam, UK), E-cadherin (1:1,000, catalog no. ab76055, Abcam, UK), vimentin (1:1,000, catalog no. ab925475, Abcam, UK), fibronectin (1:1,000, catalog no. ab24135, Abcam, UK), CCT4 (1:1,000, catalog no. 21524-1-AP, Proteintech, IL, USA), and GAPDH (1:1,000, catalog no. ab1816025, Abcam, UK) were incubated with the membranes overnight, and horseradish peroxidase (HRP)-conjugated secondary antibodies were used for subsequent incubation. Immunocomplex visualization was enhanced using enhanced chemiluminescence (ECL) reagent (Appligen, Beijing, China).

#### Cell fractionation

circ\_0001018 and CCT4 mRNA abundance was detected in fractionated cytoplasm and nucleus. Most of the circ\_0001018 and CCT4 mRNA was then localized. Nuclear and cytoplasmic RNA were extracted from cells using a cytoplasmic and nuclear RNA purification kit (Invitrogen, CA, USA). Briefly, TPC-1 and IHH-4 cells were incubated with lysis solution on ice for 10 min. Then, the cells were centrifuged at  $12,000 \times g$  for 3 min. Cytoplasmic RNA from the supernatant and nuclear RNA from the nucleus were collected and purified. GAPDH (primarily detected in the cytoplasmic fraction) and U6 (primarily detected in the nuclear fraction) were used as the endogenous controls for the cytoplasmic and nuclear fraction, respectively.

#### FISH assay

The FISH assay was used to confirm the subcellular localization of circ\_0001018 and linear mRNA (CCT4) using a FISH kit (RiboBio,

China) according to the instructions with the kit. Briefly, the FISH probes targeting the back-splicing site of circ\_0001018 were designed and labeled by Cy5, and the FISH probes of linear mRNA (CCT4) were designed and labeled by fluorescein isothiocyanate (FITC). The TPC-1 and IHH-4 cells were fixed with 4% paraformaldehyde for 15 min and permeabilized with 0.5% Triton X-100 for 10 min. Then, the cells were hybridized with Cy5-labeled FISH probes overnight. After hybridization, the cells were washed using saline sodium citrate (SSC) solution for 5 min and stained with DAPI for 10 min without light. Finally, the images were acquired by a fluorescence microscope.

#### RIP assay

A RIP assay was performed in TPC-1 and IHH-4 cell lines 48 h after transfection with miR-338-3p mimic or mimic control. A Magna RIP RNA-binding protein immunoprecipitation kit (Millipore) was chosen for the experiment. Briefly,  $1 \times 10^7$  cells were lysed in RNA lysis buffer, and magnetic beads were added to the lysate in RIP buffer. The magnetic beads were conjugated to human anti-Ago2 antibody or mouse immunoglobulin G (IgG) (Millipore). IgG was used as the control. Proteinase K was added to the samples. Precipitated RNA was released and collected. The enrichment of circ\_0001018 and circ\_0000011 was respectively examined using RT-PCR. The divergent primers were provided in Table S2.

#### RNA pull down

The RNA pull-down assay was carried out according to the previous study.<sup>73</sup> bio-miR-338-3p and bio-NC (Ribobio, Guangzhou, China) were introduced into TPC-1 and IHH-4 cells. 48 h later, the cells were collected, washed with PBS, and incubated with lysis buffer (Thermo Fisher Scientific, DE, USA). The lysate was then placed in streptavidin beads (Thermo Fisher Scientific, DE, USA) and pre-treated with RNase-free bovine serum albumin (BSA) and yeast tRNA at 4°C for 2 h. Next, a pull-down test was performed using a magnetic stent (Promega, Fitchburg, WI, USA). The RNA complex bound to the beads was eluted and extracted using TRIzol for the RT-PCR analysis.

#### Cell survival assays

CCK-8 reagent (Dojindo Laboratories, Kumamoto, Japan) was used to analyze cell survival. The two cell lines were seeded and incubated in 96-well plates and the density was about 5,000 cells per well. sh-circ\_0001018 and/or miR-338-3p inhibitor, miR-338-3p mimic, and/or SOX4-OE were transfected into cells for 48 h and CCK-8 reagent (10  $\mu$ L) was added at the time points of 0, 24, 48, or 72 h. An enzyme-labeling instrument (Thermo Fisher Scientific, USA) was

### Figure 10. miR-338-3p inhibited cell migration and invasion in TPC-1 and IHH-4 cells, which was reversed by SOX4 overexpression

(A) Cell survival was determined by a CCK-8 assay (reflected by OD<sub>450</sub> values) in TPC-1 and IHH-4 cells transfected with miRNA mimic, SOX4 overexpression plasmids, or both continuing for 3 days. (B) After transfection with a miRNA mimic, SOX4 overexpression plasmids, or both, a wound-healing assay was performed in TPC-1 and IHH-4 cells. (C) Cell migration was assessed by transwell migration assays, and miRNA mimic, SOX4 overexpression plasmids, or both were transfected into cells. Bar graphs were produced to illustrate the migratory cell numbers. (D) Cell invasion was assessed by transwell invasion assays. miRNA mimic, SOX4 overexpression plasmids, or both were transfected. (E) The protein levels of E-cadherin, vimentin, and fibronectin were detected by immunoblot analysis. n = 3, repetition = 3. Data indicate mean  $\pm$  SD. Statistical analysis was conducted using a one-way ANOVA. All other groups were compared with the control group. \*\*p < 0.01, versus control; ##p < 0.01, compared with mimic group.



used to measure the optical absorbance at 450 nm of every sample. The optical absorbance reflects the cell survival conditions.

#### EdU assay

An EdU detection kit (Ribobio, China) was used to assess cell proliferation. Briefly, TPC-1 and IHH-4 cells in the exponential phase were cultured in medium containing 50  $\mu$ M EdU for 12 h at 37°C. Then, the cells were fixed in 4% paraformaldehyde and permeabilized using 0.5% Triton X-100 for 5 min. After the wash with PBS, the cells were stained with Apollo staining solution for 30 min, followed by counterstaining with Hoechst 33342 dye (Invitrogen, USA). Finally, the cells were observed under a fluorescence microscope.

#### Flow cytometry analysis

Cell apoptosis and cell cycle profiling were obtained using a flow cytometer. For cell apoptosis, an annexin V-FITC/propidium iodide (PI) cell apoptosis detection kit (BioLegend, USA) was used.  $5 \times 10^6$  cells were collected and resuspended in 100  $\mu$ L of binding buffer. Then, annexin V-FITC and PI (1:1 in volume) were added to the cells for 25 min in the dark. As for cell cycle profiling, a cell cycle assay kit (Vazyme, China) was used. Briefly, the transfected cells were resuspended in pre-cooling PBS and fixed in 75% anhydrous ethanol overnight. Next, after RNase digestion, the cells were stained with 20  $\mu$ L of PI without light for 30 min. All apoptosis and cell cycle profiling data were obtained from the built-in software.

#### Wound-healing assay

A wound-healing assay was performed for analysis of migration rate *in vitro*.  $5 \times 10^5$  cells/well (TPC-1 and IHH-4 cells) were cultured in a six-well plate and incubated overnight. After 90% cell confluence, the medium was replaced with the serum-free medium. After incubation for 12 h, the cells were scratched using 200- $\mu$ L pipette tips. After removing the exfoliated cells with PBS, the fresh serum-free medium was added for 24 h of incubation. At 0 and 24 h after scratching, the images were obtained using an inverted microscope (Nikon, Japan), and the wound width was measured by Image-Pro Plus software (Media Cybernetics, USA).

#### Transwell migration and invasion assays

The migration and invasion abilities of both cell lines were assessed using a transwell assay. Initially, we seeded PTC cells in the upper chambers of every 8- $\mu$ m transwell (Millipore, Billerica, MA, USA) with (invasion assays) or without (migration assays) the coating of Matrigel. For migration assays, the upper chamber was seeded with PTC cells ( $2 \times 10^4$  cells per well) in medium without serum while the lower chamber was added with 10% serum. Matrigel-coated chambers were used for invasion assays. A 24 h of incubation to allow the cells to migrate and 48 h to allow them to invade into lower chambers, the upper chambers were collected. PTC cells on the upper surface of the filter were removed, and the cells attached to the lower chambers were quantified under a microscope. We chose five random fields and counted the cell numbers in every field using an optical inverted microscope (Nikon, Tokyo, Japan).

#### Bioinformatics analysis

Datasets of GEO: GSE3678 and GSE60542 were downloaded from GEO database. The upregulated DEGs of GEO: GSE3678 were screened out using a threshold of an adjusted  $p < 0.05$  and a log fold changed (FC)  $> 0$ . The upregulated DEGs as well as the overlapped target genes of miR-338-3p from TargetScan Human 7.2 and miR-Walk databases were then imported into Metascape, thus showing the enriched GO terms of the two gene lists. In addition, we acquired expression data of SOX4 in thyroid cancer from GEPIA, GEO (GEO: GSE3678 and GSE60542), and Oncomine (Giordano thyroid statistics) databases.

#### Statistical analysis

Data are reported in the format of mean  $\pm$  SD from at least three independent experiments. A Student's two-tailed unpaired t test was used to determine differences between two groups. One-way ANOVA with Dunnett's post hoc method was used to determine the differences among multiple groups.  $p < 0.05$  was considered statistically significant.

#### Ethics approval and consent to participation

The scientific experiment with the tissue samples was certificated by the participants and approved by the Ethics Committee of China-Japan Union Hospital of Jilin University. The written informed consent was obtained from every participant.

#### Availability of data and materials

The datasets used in the study are available from the corresponding author upon reasonable request.

#### SUPPLEMENTAL INFORMATION

Supplemental Information can be found online at <https://doi.org/10.1016/j.omtn.2021.02.023>.

#### ACKNOWLEDGMENTS

This work was supported by the Horizontal Scientific Research Project of Jilin University (no. 2018YX389).

#### AUTHOR CONTRIBUTIONS

Q.L. and Q.F. carried out the experiments. F.G. wrote the manuscript with support from Q.F. and Q.L. G.S. helped supervise the project. Q.L. and G.S. conceived the original idea.

#### DECLARATION OF INTERESTS

The authors declare no competing interests.

#### REFERENCES

1. Xing, M., Alzahrani, A.S., Carson, K.A., Viola, D., Elisei, R., Bendlova, B., Yip, L., Mian, C., Vianello, F., Tuttle, R.M., et al. (2013). Association between BRAF V600E mutation and mortality in patients with papillary thyroid cancer. *JAMA* 309, 1493–1501.
2. Siegel, R.L., Miller, K.D., and Jemal, A. (2019). Cancer statistics, 2019. *CA Cancer J. Clin.* 69, 7–34.
3. Chen, W., Zheng, R., Baade, P.D., Zhang, S., Zeng, H., Bray, F., Jemal, A., Yu, X.Q., and He, J. (2016). Cancer statistics in China, 2015. *CA Cancer J. Clin.* 66, 115–132.

4. Haugen, B.R., Alexander, E.K., Bible, K.C., Doherty, G.M., Mandel, S.J., Nikiforov, Y.E., Pacini, F., Randolph, G.W., Sawka, A.M., Schlumberger, M., et al. (2016). 2015 American Thyroid Association management guidelines for adult patients with thyroid nodules and differentiated thyroid cancer: the American Thyroid Association Guidelines Task Force on Thyroid Nodules and Differentiated Thyroid Cancer. *Thyroid* 26, 1–133.
5. Hay, I.D., Thompson, G.B., Grant, C.S., Bergstralh, E.J., Dvorak, C.E., Gorman, C.A., Maurer, M.S., McIver, B., Mullan, B.P., Oberg, A.L., et al. (2002). Papillary thyroid carcinoma managed at the Mayo Clinic during six decades (1940–1999): temporal trends in initial therapy and long-term outcome in 2444 consecutively treated patients. *World J. Surg.* 26, 879–885.
6. Fröhlich, E., and Wahl, R. (2014). The current role of targeted therapies to induce radioiodine uptake in thyroid cancer. *Cancer Treat. Rev.* 40, 665–674.
7. Cai, X., Zhao, Z., Dong, J., Lv, Q., Yun, B., Liu, J., Shen, Y., Kang, J., and Li, J. (2019). Circular RNA circBACH2 plays a role in papillary thyroid carcinoma by sponging miR-139-5p and regulating LMO4 expression. *Cell Death Dis.* 10, 184.
8. Ashwal-Fluss, R., Meyer, M., Pamudurti, N.R., Ivanov, A., Bartok, O., Hanan, M., Evtantal, N., Memczak, S., Rajewsky, N., and Kadener, S. (2014). circRNA biogenesis competes with pre-mRNA splicing. *Mol. Cell* 56, 55–66.
9. Alhasan, A.A., Izuogu, O.G., Al-Balool, H.H., Steyn, J.S., Evans, A., Colzani, M., Ghevaert, C., Mountford, J.C., Marenah, L., Elliott, D.J., et al. (2016). Circular RNA enrichment in platelets is a signature of transcriptome degradation. *Blood* 127, e1–e11.
10. Zlotorynski, E. (2015). Non-coding RNA: circular RNAs promote transcription. *Nat. Rev. Mol. Cell Biol.* 16, 206.
11. Memczak, S., Jens, M., Elefsinioti, A., Torti, F., Krueger, J., Rybak, A., Maier, L., Mackowiak, S.D., Gregersen, L.H., Munschauer, M., et al. (2013). Circular RNAs are a large class of animal RNAs with regulatory potency. *Nature* 495, 333–338.
12. Qu, S., Yang, X., Li, X., Wang, J., Gao, Y., Shang, R., Sun, W., Dou, K., and Li, H. (2015). Circular RNA: a new star of noncoding RNAs. *Cancer Lett.* 365, 141–148.
13. Yang, C., Yuan, W., Yang, X., Li, P., Wang, J., Han, J., Tao, J., Li, P., Yang, H., Lv, Q., and Zhang, W. (2018). Circular RNA circ-ITCH inhibits bladder cancer progression by sponging miR-17/miR-224 and regulating p21, PTEN expression. *Mol. Cancer* 17, 19.
14. Li, Z., Huang, C., Bao, C., Chen, L., Lin, M., Wang, X., Zhong, G., Yu, B., Hu, W., Dai, L., et al. (2015). Exon-intron circular RNAs regulate transcription in the nucleus. *Nat. Struct. Mol. Biol.* 22, 256–264.
15. Granados-Riveron, J.T., and Aquino-Jarquín, G. (2016). The complexity of the translation ability of circRNAs. *Biochim. Biophys. Acta* 1859, 1245–1251.
16. Nana-Sinkam, S.P., and Croce, C.M. (2014). MicroRNA regulation of tumorigenesis, cancer progression and interpatient heterogeneity: towards clinical use. *Genome Biol.* 15, 445.
17. Wang, M., Chen, B., Ru, Z., and Cong, L. (2018). CircRNA circ-ITCH suppresses papillary thyroid cancer progression through miR-22-3p/CBL/β-catenin pathway. *Biochem. Biophys. Res. Commun.* 504, 283–288.
18. Li, Q., Pan, X., Zhu, D., Deng, Z., Jiang, R., and Wang, X. (2019). Circular RNA MAT2B promotes glycolysis and malignancy of hepatocellular carcinoma through the miR-338-3p/PKM2 axis under hypoxic stress. *Hepatology* 70, 1298–1316.
19. Xu, Y., Yu, J., Huang, Z., Fu, B., Tao, Y., Qi, X., Mou, Y., Hu, Y., Wang, Y., Cao, Y., et al. (2020). Circular RNA hsa\_circ\_0000326 acts as a miR-338-3p sponge to facilitate lung adenocarcinoma progression. *J. Exp. Clin. Cancer Res.* 39, 57.
20. Qian, W., Huang, T., and Feng, W. (2020). Circular RNA HIPK3 promotes EMT of cervical cancer through sponging miR-338-3p to up-regulate HIF-1α. *Cancer Manag. Res.* 12, 177–187.
21. Sui, G.Q., Fei, D., Guo, F., Zhen, X., Luo, Q., Yin, S., and Wang, H. (2017). MicroRNA-338-3p inhibits thyroid cancer progression through targeting AKT3. *Am. J. Cancer Res.* 7, 1177–1187.
22. Dy, P., Penzo-Méndez, A., Wang, H., Pedraza, C.E., Macklin, W.B., and Lefebvre, V. (2008). The three SoxC proteins—Sox4, Sox11 and Sox12—exhibit overlapping expression patterns and molecular properties. *Nucleic Acids Res.* 36, 3101–3117.
23. Moreno, C.S. (2020). SOX4: the unappreciated oncogene. *Semin. Cancer Biol.* 67, 57–64.
24. Hanieh, H., Ahmed, E.A., Vishnubalaji, R., and Alajez, N.M. (2020). SOX4: epigenetic regulation and role in tumorigenesis. *Semin. Cancer Biol.* 67, 91–104.
25. Min, X.S., Huang, P., Liu, X., Dong, C., Jiang, X.L., Yuan, Z.T., Mao, L.F., and Chang, S. (2015). Bioinformatics analyses of significant prognostic risk markers for thyroid papillary carcinoma. *Tumour Biol.* 36, 7457–7463.
26. Guo, F., Fu, Q., Wang, Y., and Sui, G. (2019). Long non-coding RNA NR2F1-AS1 promoted proliferation and migration yet suppressed apoptosis of thyroid cancer cells through regulating miRNA-338-3p/CCND1 axis. *J. Cell. Mol. Med.* 23, 5907–5919.
27. Huang, X.H., Chen, J.S., Wang, Q., Chen, X.L., Wen, L., Chen, L.Z., Bi, J., Zhang, L.J., Su, Q., and Zeng, W.T. (2011). miR-338-3p suppresses invasion of liver cancer cell by targeting stemness. *J. Pathol.* 225, 463–472.
28. Chen, X., Pan, M., Han, L., Lu, H., Hao, X., and Dong, Q. (2013). miR-338-3p suppresses neuroblastoma proliferation, invasion and migration through targeting PREX2a. *FEBS Lett.* 587, 3729–3737.
29. Huang, N., Wu, Z., Lin, L., Zhou, M., Wang, L., Ma, H., Xia, J., Bin, J., Liao, Y., and Liao, W. (2015). miR-338-3p inhibits epithelial-mesenchymal transition in gastric cancer cells by targeting ZEB2 and MACC1/Met/Akt signaling. *Oncotarget* 6, 15222–15234.
30. Li, P., Chen, X., Su, L., Li, C., Zhi, Q., Yu, B., Sheng, H., Wang, J., Feng, R., Cai, Q., et al. (2013). Epigenetic silencing of miR-338-3p contributes to tumorigenicity in gastric cancer by targeting SSX2IP. *PLoS ONE* 8, e66782.
31. Liu, H.S., Zheng, R.N., Guo, L.B., and Fu, X.J. (2020). Circular RNA circ\_0000615 knockdown suppresses the development of nasopharyngeal cancer through regulating the miR-338-3p/FGF2 axis. *Neoplasma* 67, 1032–1041.
32. Pu, J., Wang, J., Li, W., Lu, Y., Wu, X., Long, X., Luo, C., and Wei, H. (2020). hsa\_circ\_0000092 promotes hepatocellular carcinoma progression through up-regulating HN1 expression by binding to microRNA-338-3p. *J. Cell. Mol. Med.* Published online February 20, 2020. <https://doi.org/10.1111/jcmm.15010>.
33. Wang, L., Peng, X., Lu, X., Wei, Q., Chen, M., and Liu, L. (2019). Inhibition of hsa\_circ\_0001313 (circCCDC66) induction enhances the radio-sensitivity of colon cancer cells via tumor suppressor miR-338-3p: effects of circ\_0001313 on colon cancer radio-sensitivity. *Pathol. Res. Pract.* 215, 689–696.
34. Li, S., Niu, X., Li, H., Liang, Y., Sun, Z., and Yan, Y. (2019). circ\_0000003 promotes the proliferation and metastasis of non-small cell lung cancer cells via miR-338-3p/insulin receptor substrate 2. *Cell Cycle* 18, 3525–3539.
35. Zhang, L., and Ding, F. (2019). hsa\_circ\_0008945 promoted breast cancer progression by targeting miR-338-3p. *OncoTargets Ther.* 12, 6577–6589.
36. Li, Y., Chen, P., Zu, L., Liu, B., Wang, M., and Zhou, Q. (2016). MicroRNA-338-3p suppresses metastasis of lung cancer cells by targeting the EMT regulator Sox4. *Am. J. Cancer Res.* 6, 127–140.
37. Jin, Y., Zhao, M., Xie, Q., Zhang, H., Wang, Q., and Ma, Q. (2015). MicroRNA-338-3p functions as tumor suppressor in breast cancer by targeting SOX4. *Int. J. Oncol.* 47, 1594–1602.
38. Tong, Z., Meng, X., Wang, J., and Wang, L. (2017). MicroRNA-338-3p targets SOX4 and inhibits cell proliferation and invasion of renal cell carcinoma. *Exp. Ther. Med.* 14, 5200–5206.
39. Zhang, J.X., Lu, J., Xie, H., Wang, D.P., Ni, H.E., Zhu, Y., Ren, L.H., Meng, X.X., and Wang, R.L. (2019). circHIPK3 regulates lung fibroblast-to-myofibroblast transition by functioning as a competing endogenous RNA. *Cell Death Dis.* 10, 182.
40. Ren, H., Liu, Z., Liu, S., Zhou, X., Wang, H., Xu, J., Wang, D., and Yuan, G. (2018). Profile and clinical implication of circular RNAs in human papillary thyroid carcinoma. *PeerJ* 6, e5363.
41. Lan, X., Cao, J., Xu, J., Chen, C., Zheng, C., Wang, J., Zhu, X., Zhu, X., and Ge, M. (2018). Decreased expression of hsa\_circ\_0137287 predicts aggressive clinicopathologic characteristics in papillary thyroid carcinoma. *J. Clin. Lab. Anal.* 32, e22573.
42. Wang, H., Yan, X., Zhang, H., and Zhan, X. (2019). circRNA circ\_0067934 overexpression correlates with poor prognosis and promotes thyroid carcinoma progression. *Med. Sci. Monit.* 25, 1342–1349.
43. Lan, X., Xu, J., Chen, C., Zheng, C., Wang, J., Cao, J., Zhu, X., and Ge, M. (2018). The landscape of circular RNA expression profiles in papillary thyroid carcinoma based on RNA sequencing. *Cell. Physiol. Biochem* 47, 1122–1132.

44. Peng, N., Shi, L., Zhang, Q., Hu, Y., Wang, N., and Ye, H. (2017). Microarray profiling of circular RNAs in human papillary thyroid carcinoma. *PLoS ONE* *12*, e0170287.
45. Yang, C., Wei, Y., Yu, L., and Xiao, Y. (2019). Identification of altered circular RNA expression in serum exosomes from patients with papillary thyroid carcinoma by high-throughput sequencing. *Med. Sci. Monit.* *25*, 2785–2791.
46. Liu, Q., Pan, L.Z., Hu, M., and Ma, J.Y. (2020). Molecular network-based identification of circular RNA-associated ceRNA network in papillary thyroid cancer. *Pathol. Oncol. Res.* *26*, 1293–1299.
47. Dong, R., Zhang, X.O., Zhang, Y., Ma, X.K., Chen, L.L., and Yang, L. (2016). circRNA-derived pseudogenes. *Cell Res.* *26*, 747–750.
48. Li, L., Song, Y., Shi, X., Liu, J., Xiong, S., Chen, W., Fu, Q., Huang, Z., Gu, N., and Zhang, R. (2018). The landscape of miRNA editing in animals and its impact on miRNA biogenesis and targeting. *Genome Res.* *28*, 132–143.
49. Yao, Y., Chen, X., Yang, H., Chen, W., Qian, Y., Yan, Z., Liao, T., Yao, W., Wu, W., Yu, T., et al. (2019). hsa\_circ\_0058124 promotes papillary thyroid cancer tumorigenesis and invasiveness through the NOTCH3/GATAD2A axis. *J. Exp. Clin. Cancer Res.* *38*, 318.
50. Pan, Y., Xu, T., Liu, Y., Li, W., and Zhang, W. (2019). Upregulated circular RNA circ\_0025033 promotes papillary thyroid cancer cell proliferation and invasion via sponging miR-1231 and miR-1304. *Biochem. Biophys. Res. Commun.* *510*, 334–338.
51. Wei, H., Pan, L., Tao, D., and Li, R. (2018). Circular RNA circZFR contributes to papillary thyroid cancer cell proliferation and invasion by sponging miR-1261 and facilitating C8orf4 expression. *Biochem. Biophys. Res. Commun.* *503*, 56–61.
52. Chen, F., Feng, Z., Zhu, J., Liu, P., Yang, C., Huang, R., and Deng, Z. (2018). Emerging roles of circRNA\_NEK6 targeting miR-370-3p in the proliferation and invasion of thyroid cancer via Wnt signaling pathway. *Cancer Biol. Ther.* *19*, 1139–1152.
53. Song, Z., Zhang, X., Lin, Y., Wei, Y., Liang, S., and Dong, C. (2019). LINC01133 inhibits breast cancer invasion and metastasis by negatively regulating SOX4 expression through EZH2. *J. Cell. Mol. Med.* *23*, 7554–7565.
54. Yang, J., Lin, X., Jiang, W., Wu, J., and Lin, L. (2019). lncRNA *LEF1-AS1* promotes malignancy in non-small-cell lung cancer by modulating the miR-489/SOX4 axis. *DNA Cell Biol.* *38*, 1013–1021.
55. Li, Y., Hao, J., Jiang, Y.M., Liu, Y., and Zhang, S.H. (2019). Long non-coding RNA *DSCAM-AS1* indicates a poor prognosis and modulates cell proliferation, migration and invasion in ovarian cancer via upregulating SOX4. *Eur. Rev. Med. Pharmacol. Sci.* *23*, 4143–4148.
56. Wei, D., Wang, W., Shen, B., Zhou, Y., Yang, X., Lu, G., Yang, J., and Shao, Y. (2019). MicroRNA-199a-5p suppresses migration and invasion in oral squamous cell carcinoma through inhibiting the EMT-related transcription factor SOX4. *Int. J. Mol. Med.* *44*, 185–195.
57. Chang, J., Gao, F., Chu, H., Lou, L., Wang, H., and Chen, Y. (2020). miR-363-3p inhibits migration, invasion, and epithelial-mesenchymal transition by targeting NEDD9 and SOX4 in non-small-cell lung cancer. *J. Cell. Physiol.* *235*, 1808–1820.
58. Zhong, M., Wang, W.L., and Yu, D.J. (2019). Long non-coding RNA *OR3A4* is associated with poor prognosis of human non-small cell lung cancer and regulates cell proliferation via up-regulating SOX4. *Eur. Rev. Med. Pharmacol. Sci.* *23*, 6524–6530.
59. Ding, L., Zhao, Y., Dang, S., Wang, Y., Li, X., Yu, X., Li, Z., Wei, J., Liu, M., and Li, G. (2019). Circular RNA circ-DONSON facilitates gastric cancer growth and invasion via NURF complex dependent activation of transcription factor SOX4. *Mol. Cancer* *18*, 45.
60. Ruan, M., Liu, M., Dong, Q., and Chen, L. (2015). Iodide- and glucose-handling gene expression regulated by sorafenib or cabozantinib in papillary thyroid cancer. *J. Clin. Endocrinol. Metab.* *100*, 1771–1779.
61. Ruan, X., Shi, X., Dong, Q., Yu, Y., Hou, X., Song, X., Wei, X., Chen, L., and Gao, M. (2019). Antitumor effects of anlotinib in thyroid cancer. *Endocr. Relat. Cancer* *26*, 153–164.
62. Ribeiro, F.R., Meireles, A.M., Rocha, A.S., and Teixeira, M.R. (2008). Conventional and molecular cytogenetics of human non-medullary thyroid carcinoma: characterization of eight cell line models and review of the literature on clinical samples. *BMC Cancer* *8*, 371.
63. Saiselet, M., Floor, S., Tarabichi, M., Dom, G., Hébrant, A., van Staveren, W.C., and Maenhaut, C. (2012). Thyroid cancer cell lines: an overview. *Front. Endocrinol. (Lausanne)* *3*, 133.
64. Meireles, A.M., Preto, A., Rocha, A.S., Rebocho, A.P., Máximo, V., Pereira-Castro, I., Moreira, S., Feijão, T., Botelho, T., Marques, R., et al. (2007). Molecular and genotypic characterization of human thyroid follicular cell carcinoma-derived cell lines. *Thyroid* *17*, 707–715.
65. Schweppe, R.E., Klopfer, J.P., Korch, C., Pugazhenthii, U., Benezra, M., Knauf, J.A., Fagin, J.A., Marlow, L.A., Copland, J.A., Smallridge, R.C., and Haugen, B.R. (2008). Deoxyribonucleic acid profiling analysis of 40 human thyroid cancer cell lines reveals cross-contamination resulting in cell line redundancy and misidentification. *J. Clin. Endocrinol. Metab.* *93*, 4331–4341.
66. Sekiguchi, M., Shiroko, Y., Arai, T., Kishino, T., Sugawara, I., Kusakabe, T., Suzuki, T., Yamashita, T., Obara, T., Ito, K., and Hasumi, K. (2001). Biological characteristics and chemosensitivity profile of four human anaplastic thyroid carcinoma cell lines. *Biomed. Pharmacother.* *55*, 466–474.
67. Song, B., Li, R., Zuo, Z., Tan, J., Liu, L., Ding, D., Lu, Y., and Hou, D. (2019). lncRNA *ENST00000539653* acts as an oncogenic factor via MAPK signalling in papillary thyroid cancer. *BMC Cancer* *19*, 297.
68. Ge, M.H., Jiang, L.H., Wen, Q.L., Tan, Z., Chen, C., Zheng, C.M., Zhu, X., Chen, J.W., Zhu, Z.Y., and Cai, X.J. (2018). Preliminary screening and analysis of metastasis-related lncRNA and co-expressed papillary thyroid carcinoma mRNA. *Oncol. Lett.* *16*, 3715–3725.
69. Wang, Z.L., Wang, C., Liu, W., and Ai, Z.L. (2019). Emerging roles of the long non-coding RNA *01296/microRNA-143-3p/MSI2* axis in development of thyroid cancer. *Biosci. Rep.* *39*, BSR20182376.
70. He, Y., Cao, L., Wang, L., Liu, L., Huang, Y., and Gong, X. (2020). Metformin inhibits proliferation of human thyroid cancer TPC-1 cells by decreasing LRP2 to suppress the JNK pathway. *Oncotargets Ther.* *13*, 45–50.
71. Esposito, T., Lucariello, A., Hay, E., Contieri, M., Tammaro, P., Varriale, B., Guerra, G., De Luca, A., and Perna, A. (2019). Effects of curcumin and its adjuvant on TPC1 thyroid cell line. *Chem. Biol. Interact.* *305*, 112–118.
72. Yang, Y., Ding, L., Li, Y., and Xuan, C. (2020). hsa\_circ\_0039411 promotes tumorigenesis and progression of papillary thyroid cancer by miR-1179/ABCA9 and miR-1205/MTA1 signaling pathways. *J. Cell. Physiol.* *235*, 1321–1329.
73. Sui, H., Fan, S., Liu, W., Li, Y., Zhang, X., Du, Y., and Bao, H. (2020). LINC00028 regulates the development of TGFβ1-treated human tenon capsule fibroblasts by targeting miR-204-5p. *Biochem. Biophys. Res. Commun.* *525*, 197–203.



OMTN, Volume 24

## **Supplemental information**

**hsa\_circ\_0001018 promotes papillary thyroid cancer by facilitating cell survival, invasion, G<sub>1</sub>/S cell cycle progression, and repressing cell apoptosis via crosstalk with miR-338-3p and SOX4**

**Qiang Luo, Feng Guo, Qingfeng Fu, and Guoqing Sui**

Table S1 The baseline characteristics of PTC patients (n = 51)

| Characteristics       | No. of cases | Expression of circ_0001018 |           | P                  |
|-----------------------|--------------|----------------------------|-----------|--------------------|
|                       |              | High (n=26)                | Low(n=25) |                    |
| Gender                |              |                            |           |                    |
| male                  | 24           | 14                         | 10        | 0.322              |
| female                | 27           | 12                         | 15        |                    |
| Age                   |              |                            |           |                    |
| <55                   | 22           | 9                          | 13        | 0.210              |
| ≥55                   | 29           | 17                         | 12        |                    |
| TNM stage             |              |                            |           |                    |
| I-II                  | 28           | 10                         | 18        | 0.016 <sup>a</sup> |
| III-IV                | 23           | 16                         | 7         |                    |
| Tumor size            |              |                            |           |                    |
| <2                    | 34           | 15                         | 19        | 0.167              |
| ≥2                    | 17           | 11                         | 6         |                    |
| Lymph node metastasis |              |                            |           |                    |
| Present               | 38           | 23                         | 15        | 0.020 <sup>a</sup> |
| Absent                | 13           | 3                          | 10        |                    |
| Distant metastasis    |              |                            |           |                    |
| Present               | 15           | 11                         | 4         | 0.039 <sup>a</sup> |
| Absent                | 36           | 15                         | 21        |                    |

The data were analyzed using the chi-square test. <sup>a</sup>P<0.05.

Table S2 the sequences of circ\_0001018 OE, shRNA and miR-338-3p mimic

| Name                  | Sequence (5'-3')       |
|-----------------------|------------------------|
| circ_0001018 OE-F     | CGGATCCGATGGATAATCAAA  |
| circ_0001018 OE-R     | GGAATTCCGTTTGACGAGTTC  |
| circ_0001018 shRNA1-F | GCTCAAGATGGATAATCAA    |
| circ_0001018 shRNA1-R | TTGATTATCCATCTTGAGC    |
| circ_0001018 shRNA2-F | GGTGATTAAGGATATTGAA    |
| circ_0001018 shRNA2-R | TTCAATATCCTTAATCACC    |
| miR-338-3p mimic      | AACAATATCCTGGTGCTGAGTG |
| miR-338-3p inhibitor  | UCCAGCAUCAGUGAUUUUGUUG |
| SOX4 OE-F             | CGGATCCGGCTCTAAGCTGCA  |
| SOX4 OE-R             | GGAATTCCTGACTTGGGATTT  |



Table S3 Primers used in this study

| Primer        | Primer Sequence (5'-3')  |
|---------------|--------------------------|
| circ0001018-F | CTGAGTTAGCTGAGGAGGTCA    |
| circ0001018-R | TGGGCATAGTCAGAAACCACT    |
| circ0000011-F | AGGTGGTGTTCGAGATGAG      |
| circ0000011-R | GTAGCCAGCATAGGCCAAGA     |
| circ0000326-F | CAAAGTCAGATCAGTTATGGGACA |
| circ0000326-R | TGCCAGTTACTCCAGCATAAA    |
| circ0001199-F | CTACGCTTGTGACGATGAGC     |
| circ0001199-R | GAAGGGGGTGTCAAACCTCA     |
| circ0000937-F | GCACTATCTGCTGAGCCAAG     |
| circ0000937-R | GAACTGGGGCTTGTCATCC      |
| CCT4-F        | GTATTACATCCAGCAGCCAGA    |
| CCT4-R        | CTGTGGCTGGGTCAATCACT     |
| miR-338-3p-F  | TGCGGTCCAGCATCAGTGAT     |
| miR-338-3p-R  | CCAGTGCAGGGTCCGAGGT      |
| SOX4-F        | GGTCTCTAGTTCTTGCACGCTC   |
| SOX4-R        | CGGAATCGGCACTAAGGAG      |

Figure S1 Expression levels of the four most significant circular RNAs in PTC and the detection of transfection efficiency of circ\_0001018 shRNAs and overexpression vectors.

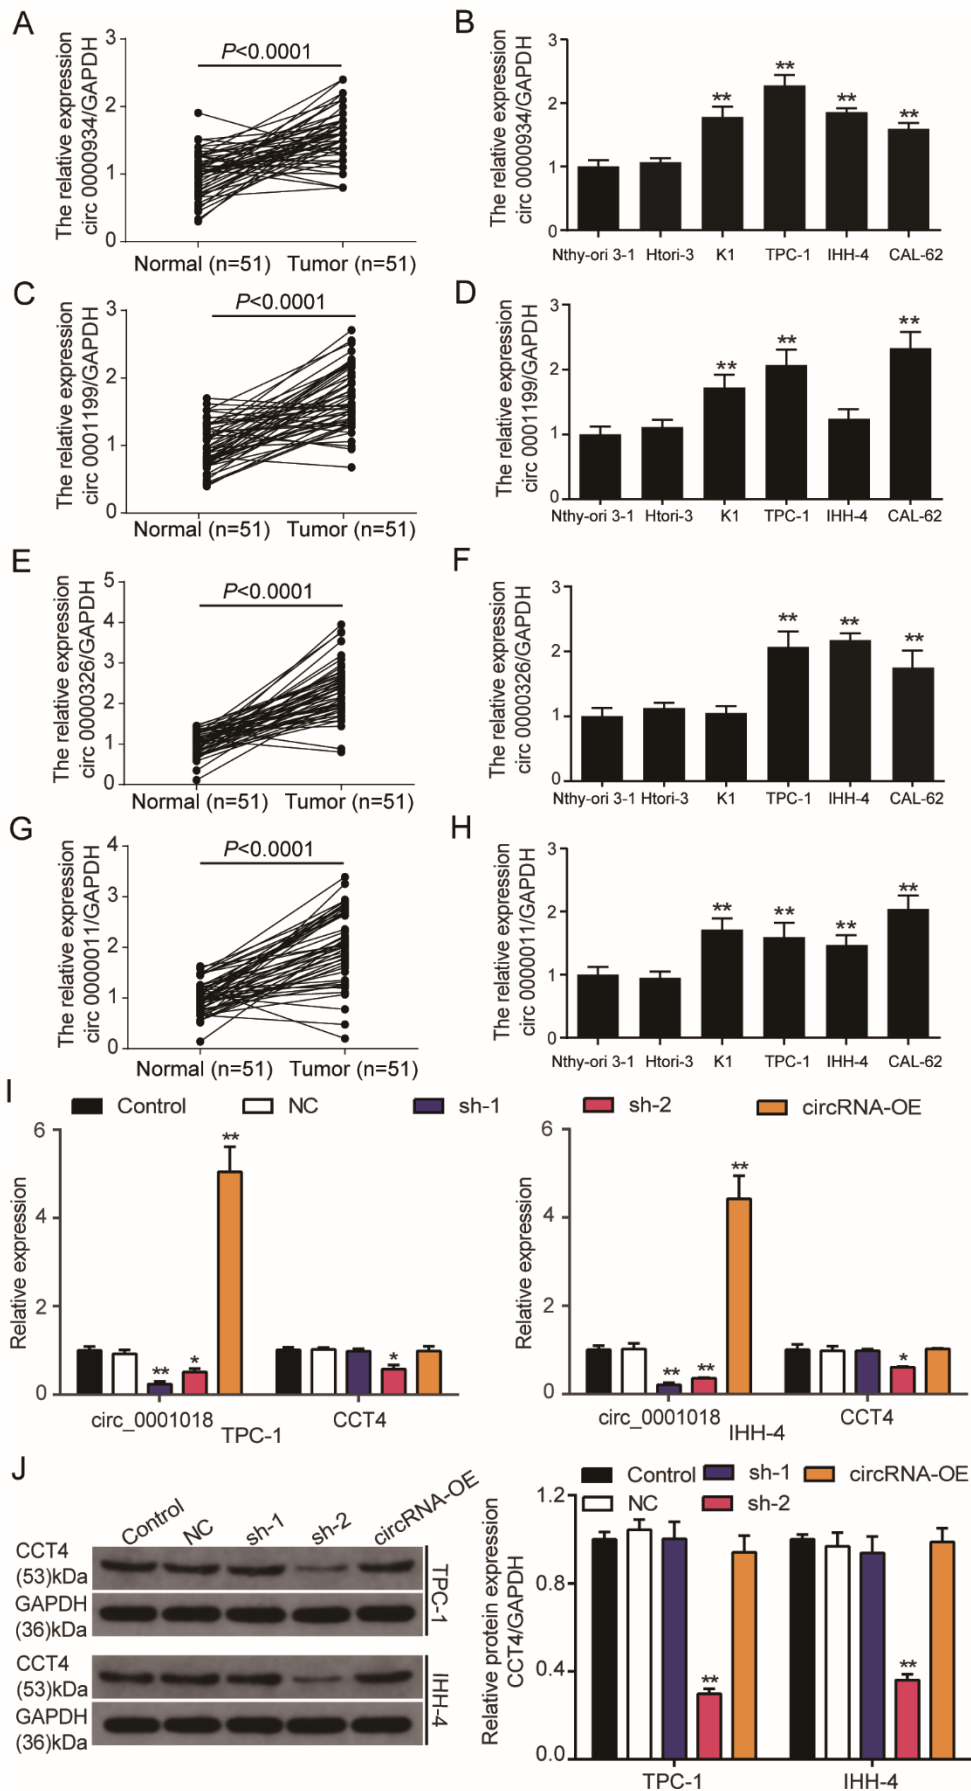

Figure S2 The enrichment of five most significant circular RNAs in PTC cells on miR-338-3p.

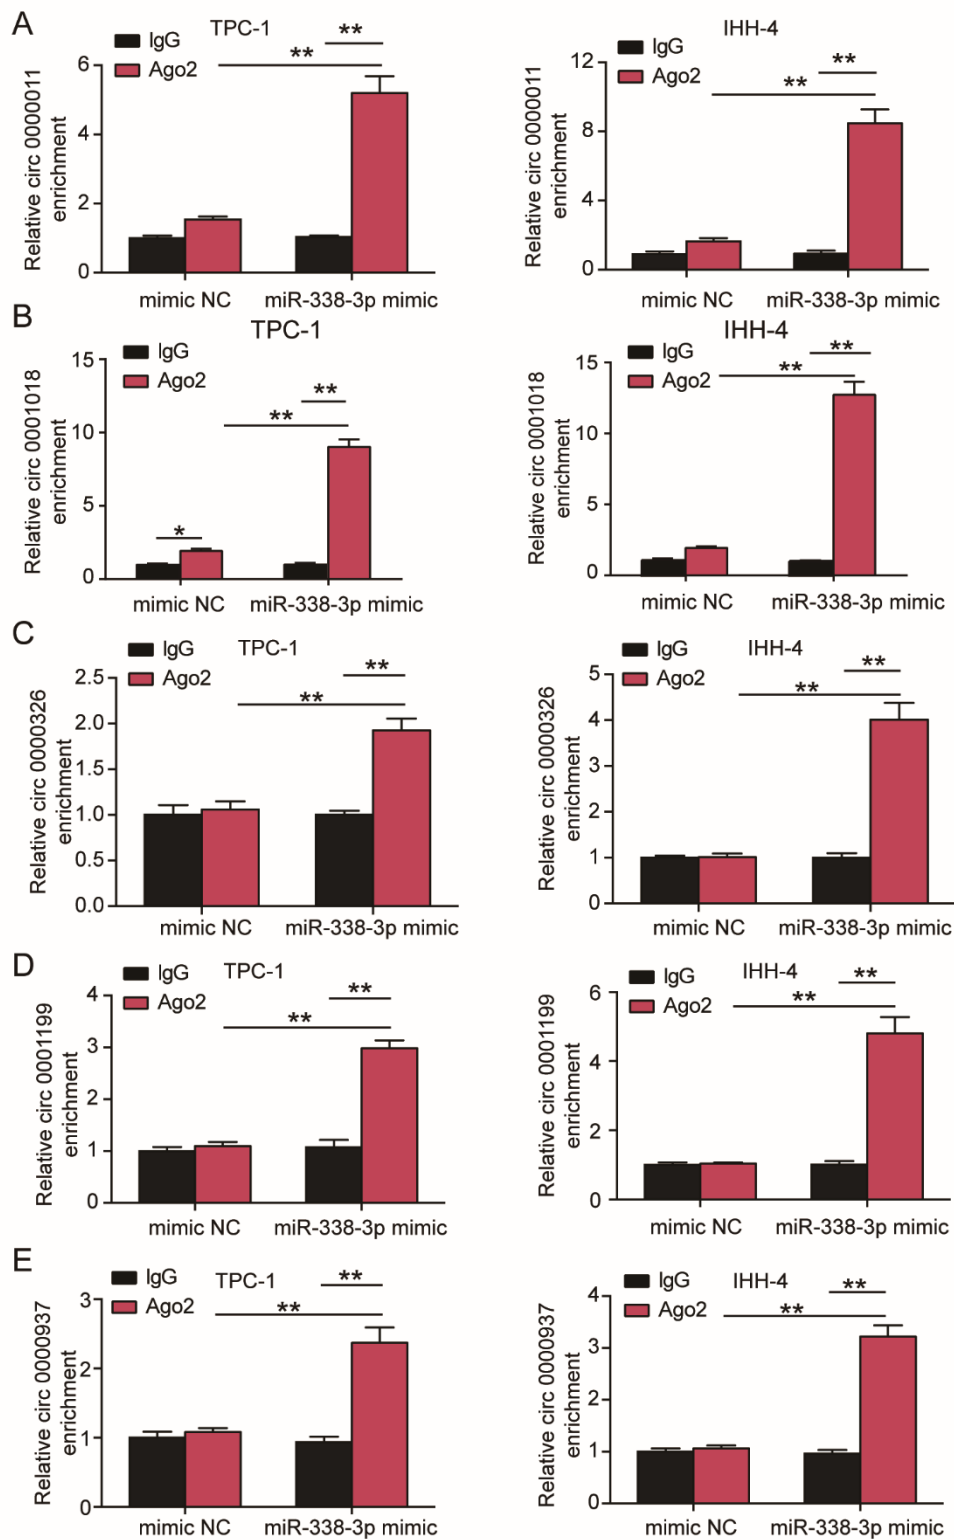



Figure S3 The structure of circ\_0001018. CDS (coding sequences) are colored in green.

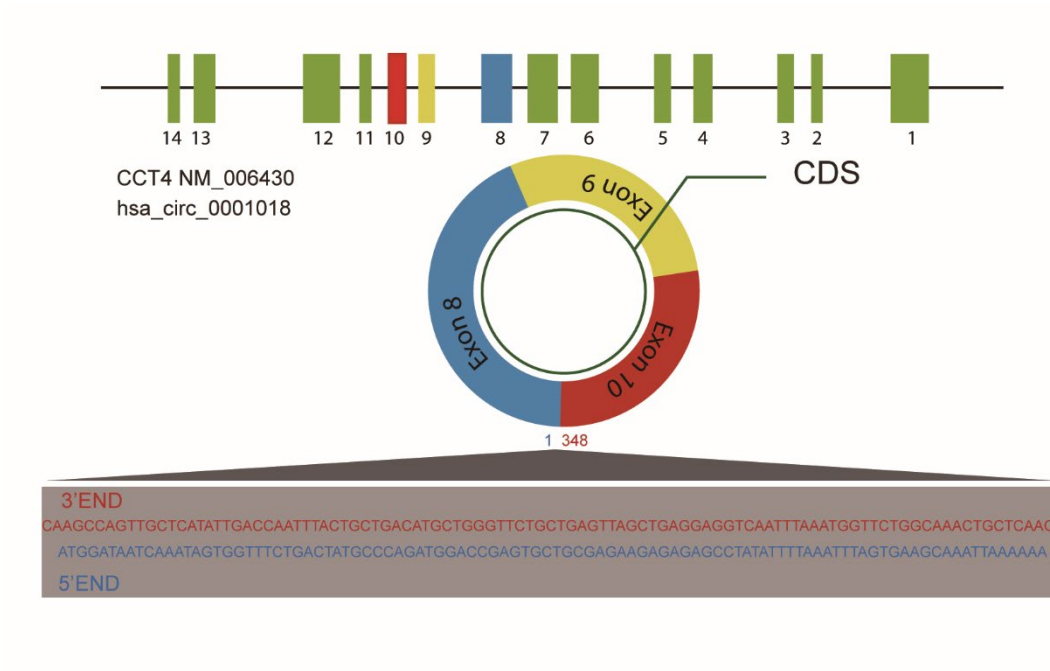

Figure S4 SOX4 was detected to express more in tumor tissues than the normal in TCGA database.

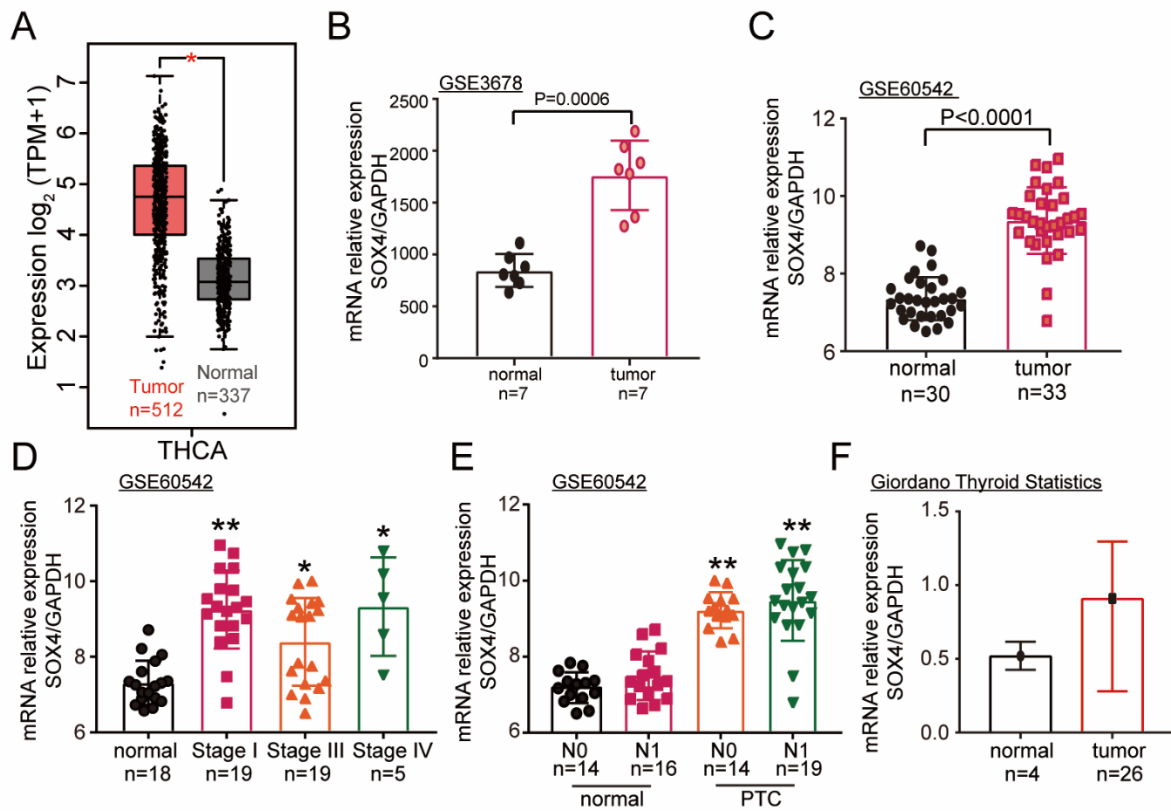

Figure S5 All images of western blot in this study.

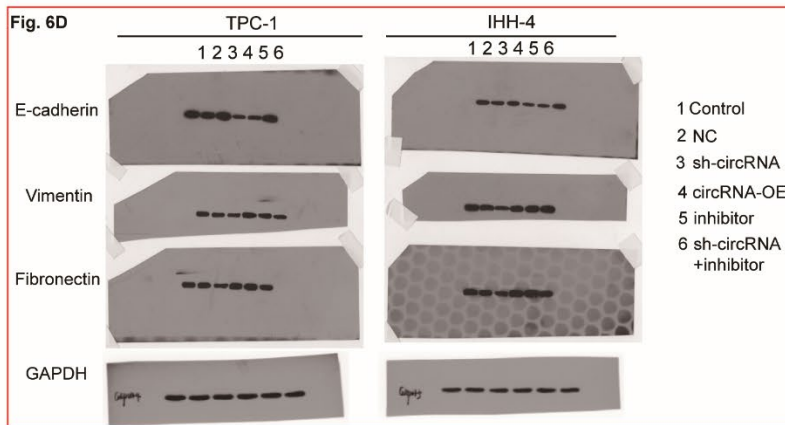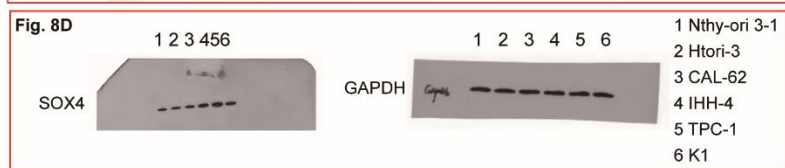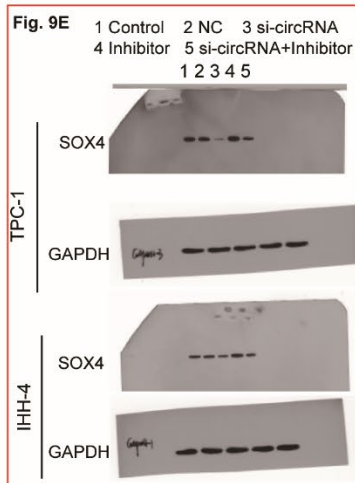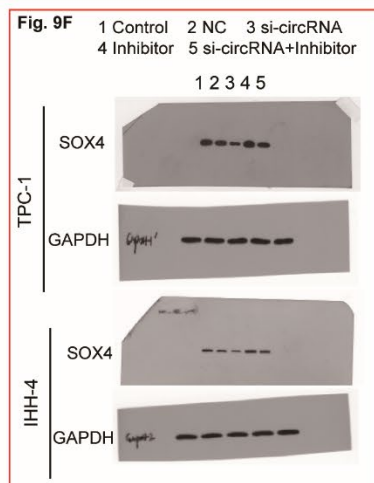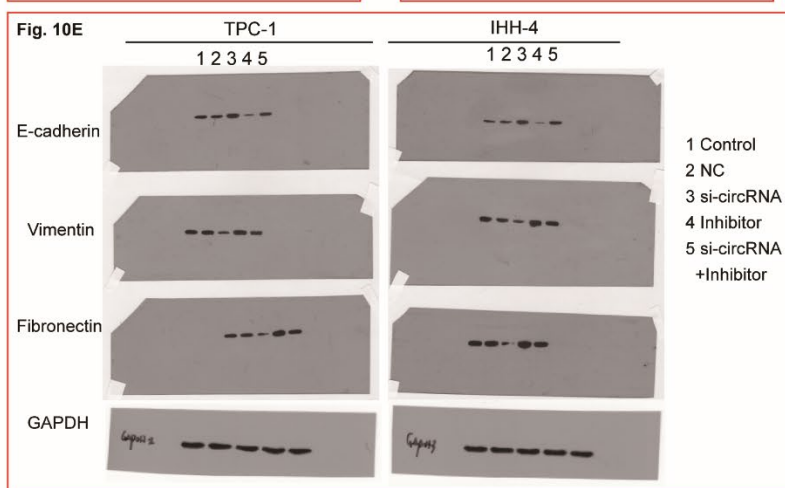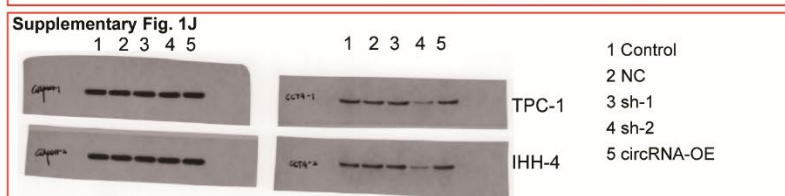

## References

1. Xing, M, Alzahrani, AS, Carson, KA, Viola, D, Elisei, R, Bendlova, B, et al. (2013). Association between BRAF V600E mutation and mortality in patients with papillary thyroid cancer. *Jama* 309: 1493-1501.
2. Siegel, RL, Miller, KD, and Jemal, A (2019). Cancer statistics, 2019. *CA: a cancer journal for clinicians* 69: 7-34.
3. Chen, W, Zheng, R, Baade, PD, Zhang, S, Zeng, H, Bray, F, et al. (2016). Cancer statistics in China, 2015. *CA: a cancer journal for clinicians* 66: 115-132.
4. Haugen, BR, Alexander, EK, Bible, KC, Doherty, GM, Mandel, SJ, Nikiforov, YE, et al. (2016). 2015 American Thyroid Association Management Guidelines for Adult Patients with Thyroid Nodules and Differentiated Thyroid Cancer: The American Thyroid Association Guidelines Task Force on Thyroid Nodules and Differentiated Thyroid Cancer. *Thyroid* 26: 1-133.
5. Hay, ID, Thompson, GB, Grant, CS, Bergstralh, EJ, Dvorak, CE, Gorman, CA, et al. (2002). Papillary thyroid carcinoma managed at the Mayo Clinic during six decades (1940-1999): temporal trends in initial therapy and long-term outcome in 2444 consecutively treated patients. *World J Surg* 26: 879-885.
6. Frohlich, E, and Wahl, R (2014). The current role of targeted therapies to induce radioiodine uptake in thyroid cancer. *Cancer Treat Rev* 40: 665-674.
7. Cai, X, Zhao, Z, Dong, J, Lv, Q, Yun, B, Liu, J, et al. (2019). Circular RNA circBACH2 plays a role in papillary thyroid carcinoma by sponging miR-139-5p and regulating LMO4 expression. *Cell death & disease* 10: 184.
8. Ashwal-Fluss, R, Meyer, M, Pamudurti, NR, Ivanov, A, Bartok, O, Hanan, M, et al. (2014). circRNA biogenesis competes with pre-mRNA splicing. *Mol Cell* 56: 55-66.
9. Alhasan, AA, Izuogu, OG, Al-Balool, HH, Steyn, JS, Evans, A, Colzani, M, et al. (2016). Circular RNA enrichment in platelets is a signature of transcriptome degradation. *Blood* 127: e1-e11.
10. Zlotorynski, E (2015). Non-coding RNA: Circular RNAs promote transcription. *Nature reviews Molecular cell biology* 16: 206.
11. Memczak, S, Jens, M, Elefsinioti, A, Torti, F, Krueger, J, Rybak, A, et al. (2013). Circular RNAs are a large class of animal RNAs with regulatory potency. *Nature* 495: 333-338.
12. Qu, S, Yang, X, Li, X, Wang, J, Gao, Y, Shang, R, et al. (2015). Circular RNA: A new star of noncoding RNAs. *Cancer letters* 365: 141-148.



13. Yang, C, Yuan, W, Yang, X, Li, P, Wang, J, Han, J, et al. (2018). Circular RNA circ-ITCH inhibits bladder cancer progression by sponging miR-17/miR-224 and regulating p21, PTEN expression. *Molecular cancer* 17: 19.
14. Li, Z, Huang, C, Bao, C, Chen, L, Lin, M, Wang, X, et al. (2015). Exon-intron circular RNAs regulate transcription in the nucleus. *Nature structural & molecular biology* 22: 256-264.
15. Granados-Riveron, JT, and Aquino-Jarquín, G (2016). The complexity of the translation ability of circRNAs. *Biochimica et biophysica acta* 1859: 1245-1251.
16. Nana-Sinkam, SP, and Croce, CM (2014). MicroRNA regulation of tumorigenesis, cancer progression and interpatient heterogeneity: towards clinical use. *Genome biology* 15: 445.
17. Wang, M, Chen, B, Ru, Z, and Cong, L (2018). CircRNA circ-ITCH suppresses papillary thyroid cancer progression through miR-22-3p/CBL/beta-catenin pathway. *Biochem Biophys Res Commun* 504: 283-288.
18. Li, Q, Pan, X, Zhu, D, Deng, Z, Jiang, R, and Wang, X (2019). Circular RNA MAT2B Promotes Glycolysis and Malignancy of Hepatocellular Carcinoma Through the miR-338-3p/PKM2 Axis Under Hypoxic Stress. *Hepatology (Baltimore, Md)* 70: 1298-1316.
19. Xu, Y, Yu, J, Huang, Z, Fu, B, Tao, Y, Qi, X, et al. (2020). Circular RNA hsa\_circ\_0000326 acts as a miR-338-3p sponge to facilitate lung adenocarcinoma progression. *J Exp Clin Cancer Res* 39: 57.
20. Qian, W, Huang, T, and Feng, W (2020). Circular RNA HIPK3 Promotes EMT of Cervical Cancer Through Sponging miR-338-3p to Up-Regulate HIF-1 $\alpha$ . *Cancer management and research* 12: 177-187.
21. Sui, GQ, Fei, D, Guo, F, Zhen, X, Luo, Q, Yin, S, et al. (2017). MicroRNA-338-3p inhibits thyroid cancer progression through targeting AKT3. *American journal of cancer research* 7: 1177-1187.
22. Dy, P, Penzo-Mendez, A, Wang, H, Pedraza, CE, Macklin, WB, and Lefebvre, V (2008). The three SoxC proteins--Sox4, Sox11 and Sox12--exhibit overlapping expression patterns and molecular properties. *Nucleic acids research* 36: 3101-3117.
23. Moreno, CS (2019). SOX4: The unappreciated oncogene. *Semin Cancer Biol.*
24. Hanieh, H, Ahmed, EA, Vishnubalaji, R, and Alajez, NM (2019). SOX4: Epigenetic regulation and role in tumorigenesis. *Semin Cancer Biol.*
25. Min, XS, Huang, P, Liu, X, Dong, C, Jiang, XL, Yuan, ZT, et al. (2015). Bioinformatics analyses

- of significant prognostic risk markers for thyroid papillary carcinoma. *Tumour Biol* 36: 7457-7463.
26. Guo, F, Fu, Q, Wang, Y, and Sui, G (2019). Long non-coding RNA NR2F1-AS1 promoted proliferation and migration yet suppressed apoptosis of thyroid cancer cells through regulating miRNA-338-3p/CCND1 axis. *J Cell Mol Med* 23: 5907-5919.
  27. Huang, XH, Chen, JS, Wang, Q, Chen, XL, Wen, L, Chen, LZ, et al. (2011). miR-338-3p suppresses invasion of liver cancer cell by targeting smoothed. *The Journal of pathology* 225: 463-472.
  28. Chen, X, Pan, M, Han, L, Lu, H, Hao, X, and Dong, Q (2013). miR-338-3p suppresses neuroblastoma proliferation, invasion and migration through targeting PREX2a. *FEBS letters* 587: 3729-3737.
  29. Huang, N, Wu, Z, Lin, L, Zhou, M, Wang, L, Ma, H, et al. (2015). MiR-338-3p inhibits epithelial-mesenchymal transition in gastric cancer cells by targeting ZEB2 and MACC1/Met/Akt signaling. *Oncotarget* 6: 15222-15234.
  30. Li, P, Chen, X, Su, L, Li, C, Zhi, Q, Yu, B, et al. (2013). Epigenetic silencing of miR-338-3p contributes to tumorigenicity in gastric cancer by targeting SSX2IP. *PLoS One* 8: e66782.
  31. Liu, HS, Zheng, RN, Guo, LB, and Fu, XJ (2020). Circular RNA circ\_0000615 knockdown suppresses the development of nasopharyngeal cancer through regulating the miR-338-3p/FGF2 axis. *Neoplasma*.
  32. Qian, W, Huang, T, and Feng, W (2020). Circular RNA HIPK3 Promotes EMT of Cervical Cancer Through Sponging miR-338-3p to Up-Regulate HIF-1alpha. *Cancer Manag Res* 12: 177-187.
  33. Pu, J, Wang, J, Li, W, Lu, Y, Wu, X, Long, X, et al. (2020). hsa\_circ\_0000092 promotes hepatocellular carcinoma progression through up-regulating HN1 expression by binding to microRNA-338-3p. *J Cell Mol Med*.
  34. Wang, L, Peng, X, Lu, X, Wei, Q, Chen, M, and Liu, L (2019). Inhibition of hsa\_circ\_0001313 (circCCDC66) induction enhances the radio-sensitivity of colon cancer cells via tumor suppressor miR-338-3p: Effects of circ\_0001313 on colon cancer radio-sensitivity. *Pathol Res Pract* 215: 689-696.
  35. Li, S, Niu, X, Li, H, Liang, Y, Sun, Z, and Yan, Y (2019). Circ\_0000003 promotes the proliferation and metastasis of non-small cell lung cancer cells via miR-338-3p/insulin receptor substrate 2. *Cell Cycle* 18: 3525-3539.
  36. Zhang, L, and Ding, F (2019). Hsa\_circ\_0008945 promoted breast cancer progression by

targeting miR-338-3p. *Onco Targets Ther* 12: 6577-6589.

37. Li, Y, Chen, P, Zu, L, Liu, B, Wang, M, and Zhou, Q (2016). MicroRNA-338-3p suppresses metastasis of lung cancer cells by targeting the EMT regulator Sox4. *Am J Cancer Res* 6: 127-140.

38. Jin, Y, Zhao, M, Xie, Q, Zhang, H, Wang, Q, and Ma, Q (2015). MicroRNA-338-3p functions as tumor suppressor in breast cancer by targeting SOX4. *Int J Oncol* 47: 1594-1602.

39. Tong, Z, Meng, X, Wang, J, and Wang, L (2017). MicroRNA-338-3p targets SOX4 and inhibits cell proliferation and invasion of renal cell carcinoma. *Exp Ther Med* 14: 5200-5206.

40. Zhang, JX, Lu, J, Xie, H, Wang, DP, Ni, HE, Zhu, Y, et al. (2019). circHIPK3 regulates lung fibroblast-to-myofibroblast transition by functioning as a competing endogenous RNA. *Cell Death Dis* 10: 182.

41. Ren, H, Liu, Z, Liu, S, Zhou, X, Wang, H, Xu, J, et al. (2018). Profile and clinical implication of circular RNAs in human papillary thyroid carcinoma. *PeerJ* 6: e5363.

42. Lan, X, Cao, J, Xu, J, Chen, C, Zheng, C, Wang, J, et al. (2018). Decreased expression of hsa\_circ\_0137287 predicts aggressive clinicopathologic characteristics in papillary thyroid carcinoma. *Journal of clinical laboratory analysis* 32: e22573.

43. Wang, H, Yan, X, Zhang, H, and Zhan, X (2019). CircRNA circ\_0067934 Overexpression Correlates with Poor Prognosis and Promotes Thyroid Carcinoma Progression. *Medical science monitor : international medical journal of experimental and clinical research* 25: 1342-1349.

44. Lan, X, Xu, J, Chen, C, Zheng, C, Wang, J, Cao, J, et al. (2018). The Landscape of Circular RNA Expression Profiles in Papillary Thyroid Carcinoma Based on RNA Sequencing. *Cellular physiology and biochemistry : international journal of experimental cellular physiology, biochemistry, and pharmacology* 47: 1122-1132.

45. Peng, N, Shi, L, Zhang, Q, Hu, Y, Wang, N, and Ye, H (2017). Microarray profiling of circular RNAs in human papillary thyroid carcinoma. *PloS one* 12: e0170287.

46. Yang, C, Wei, Y, Yu, L, and Xiao, Y (2019). Identification of Altered Circular RNA Expression in Serum Exosomes from Patients with Papillary Thyroid Carcinoma by High-Throughput Sequencing. *Medical science monitor : international medical journal of experimental and clinical research* 25: 2785-2791.

47. Liu, Q, Pan, LZ, Hu, M, and Ma, JY (2019). Molecular Network-Based Identification of Circular RNA-Associated ceRNA Network in Papillary Thyroid Cancer. *Pathol Oncol Res*.

48. Dong, R, Zhang, XO, Zhang, Y, Ma, XK, Chen, LL, and Yang, L (2016). CircRNA-derived

pseudogenes. *Cell research* 26: 747-750.

49. Li, L, Song, Y, Shi, X, Liu, J, Xiong, S, Chen, W, et al. (2018). The landscape of miRNA editing in animals and its impact on miRNA biogenesis and targeting. *Genome Res* 28: 132-143.

50. Wang, M, Chen, B, Ru, Z, and Cong, L (2018). CircRNA circ-ITCH suppresses papillary thyroid cancer progression through miR-22-3p/CBL/ $\beta$ -catenin pathway. *Biochemical and biophysical research communications* 504: 283-288.

51. Yao, Y, Chen, X, Yang, H, Chen, W, Qian, Y, Yan, Z, et al. (2019). Hsa\_circ\_0058124 promotes papillary thyroid cancer tumorigenesis and invasiveness through the NOTCH3/GATAD2A axis. *Journal of experimental & clinical cancer research : CR* 38: 318.

52. Pan, Y, Xu, T, Liu, Y, Li, W, and Zhang, W (2019). Upregulated circular RNA circ\_0025033 promotes papillary thyroid cancer cell proliferation and invasion via sponging miR-1231 and miR-1304. *Biochemical and biophysical research communications* 510: 334-338.

53. Wei, H, Pan, L, Tao, D, and Li, R (2018). Circular RNA circZFR contributes to papillary thyroid cancer cell proliferation and invasion by sponging miR-1261 and facilitating C8orf4 expression. *Biochemical and biophysical research communications* 503: 56-61.

54. Chen, F, Feng, Z, Zhu, J, Liu, P, Yang, C, Huang, R, et al. (2018). Emerging roles of circRNA\_NEK6 targeting miR-370-3p in the proliferation and invasion of thyroid cancer via Wnt signaling pathway. *Cancer biology & therapy* 19: 1139-1152.

55. Song, Z, Zhang, X, Lin, Y, Wei, Y, Liang, S, and Dong, C (2019). LINC01133 inhibits breast cancer invasion and metastasis by negatively regulating SOX4 expression through EZH2. *J Cell Mol Med* 23: 7554-7565.

56. Yang, J, Lin, X, Jiang, W, Wu, J, and Lin, L (2019). lncRNA LEF1-AS1 Promotes Malignancy in Non-Small-Cell Lung Cancer by Modulating the miR-489/SOX4 Axis. *DNA and cell biology* 38: 1013-1021.

57. Li, Y, Hao, J, Jiang, YM, Liu, Y, and Zhang, SH (2019). Long non-coding RNA DSCAM-AS1 indicates a poor prognosis and modulates cell proliferation, migration and invasion in ovarian cancer via upregulating SOX4. *European review for medical and pharmacological sciences* 23: 4143-4148.

58. Wei, D, Wang, W, Shen, B, Zhou, Y, Yang, X, Lu, G, et al. (2019). MicroRNA199a5p suppresses migration and invasion in oral squamous cell carcinoma through inhibiting the EMT-related transcription factor SOX4. *Int J Mol Med* 44: 185-195.

59. Chang, J, Gao, F, Chu, H, Lou, L, Wang, H, and Chen, Y (2019). miR-363-3p inhibits migration,



invasion, and epithelial-mesenchymal transition by targeting NEDD9 and SOX4 in non-small-cell lung cancer. *Journal of cellular physiology*.

60. Zhong, M, Wang, WL, and Yu, DJ (2019). Long non-coding RNA OR3A4 is associated with poor prognosis of human non-small cell lung cancer and regulates cell proliferation via up-regulating SOX4. *European review for medical and pharmacological sciences* 23: 6524-6530.

61. Ding, L, Zhao, Y, Dang, S, Wang, Y, Li, X, Yu, X, et al. (2019). Circular RNA circ-DONSON facilitates gastric cancer growth and invasion via NURF complex dependent activation of transcription factor SOX4. *Molecular cancer* 18: 45.

62. Ruan, M, Liu, M, Dong, Q, and Chen, L (2015). Iodide- and glucose-handling gene expression regulated by sorafenib or cabozantinib in papillary thyroid cancer. *The Journal of clinical endocrinology and metabolism* 100: 1771-1779.

63. Ruan, X, Shi, X, Dong, Q, Yu, Y, Hou, X, Song, X, et al. (2019). Antitumor effects of anlotinib in thyroid cancer. *Endocrine-related cancer* 26: 153-164.

64. Ribeiro, FR, Meireles, AM, Rocha, AS, and Teixeira, MR (2008). Conventional and molecular cytogenetics of human non-medullary thyroid carcinoma: characterization of eight cell line models and review of the literature on clinical samples. *BMC Cancer* 8: 371.

65. Saiselet, M, Floor, S, Tarabichi, M, Dom, G, Hebrant, A, van Staveren, WC, et al. (2012). Thyroid cancer cell lines: an overview. *Front Endocrinol (Lausanne)* 3: 133.

66. Meireles, AM, Preto, A, Rocha, AS, Rebocho, AP, Maximo, V, Pereira-Castro, I, et al. (2007). Molecular and genotypic characterization of human thyroid follicular cell carcinoma-derived cell lines. *Thyroid* 17: 707-715.

67. Schweppe, RE, Klopper, JP, Korch, C, Pugazhenti, U, Benezra, M, Knauf, JA, et al. (2008). Deoxyribonucleic acid profiling analysis of 40 human thyroid cancer cell lines reveals cross-contamination resulting in cell line redundancy and misidentification. *J Clin Endocrinol Metab* 93: 4331-4341.

68. Sekiguchi, M, Shiroko, Y, Arai, T, Kishino, T, Sugawara, I, Kusakabe, T, et al. (2001). Biological characteristics and chemosensitivity profile of four human anaplastic thyroid carcinoma cell lines. *Biomed Pharmacother* 55: 466-474.

69. Song, B, Li, R, Zuo, Z, Tan, J, Liu, L, Ding, D, et al. (2019). LncRNA ENST00000539653 acts as an oncogenic factor via MAPK signalling in papillary thyroid cancer. *BMC Cancer* 19: 297.

70. Ge, MH, Jiang, LH, Wen, QL, Tan, Z, Chen, C, Zheng, CM, et al. (2018). Preliminary screening

and analysis of metastasis-related lncRNA and co-expressed papillary thyroid carcinoma mRNA. *Oncol Lett* 16: 3715-3725.

71. Wang, ZL, Wang, C, Liu, W, and Ai, ZL (2019). Emerging roles of the long non-coding RNA 01296/microRNA-143-3p/MSI2 axis in development of thyroid cancer. *Biosci Rep* 39.

72. He, Y, Cao, L, Wang, L, Liu, L, Huang, Y, and Gong, X (2020). Metformin Inhibits Proliferation of Human Thyroid Cancer TPC-1 Cells by Decreasing LRP2 to Suppress the JNK Pathway. *Oncotargets Ther* 13: 45-50.

73. Esposito, T, Lucariello, A, Hay, E, Contieri, M, Tammaro, P, Varriale, B, et al. (2019). Effects of curcumin and its adjuvant on TPC1 thyroid cell line. *Chem Biol Interact* 305: 112-118.

74. Yang, Y, Ding, L, Li, Y, and Xuan, C (2020). Hsa\_circ\_0039411 promotes tumorigenesis and progression of papillary thyroid cancer by miR-1179/ABCA9 and miR-1205/MTA1 signaling pathways. *J Cell Physiol* 235: 1321-1329.

75. Sui, H, Fan, S, Liu, W, Li, Y, Zhang, X, Du, Y, et al. (2020). LINC00028 regulates the development of TGF $\beta$ 1-treated human tenon capsule fibroblasts by targeting miR-204-5p. *Biochem Biophys Res Commun*.
